# Supplementary material for: Cirbp suppression compromises DHODH-mediated ferroptosis defense and attenuates hypothermic cardioprotection in an aged donor transplantation model
Source: JCI journal article supplement (doi:10.1172/jci175645), 2024-03-12
Supplement: sd1 [file 1]

## Supplementary Materials

### ***Cirbp* suppression compromises DHODH-mediated ferroptosis defense and attenuates hypothermic cardioprotection in an aged-donor transplantation model**

Yifan Zhu; Chenyu Jiang; Jian He; Chen He; Xingliang Zhou; Xu Huang; Yi Shen; Liwei Wu; Yongnan Li; Bei Feng; Yi Yan; Jun Li; Hao Zhang; Yiwei Liu

#### **Materials and Methods**

##### **Rat model of heart transplantation**

Male adult Sprague Dawley rats were obtained from Vital River Laboratory (Beijing, China). All animal experiments were conducted in accordance with the *Guide for the Use and Care of Laboratory Animals* (National Academies Press, 2011), and all animal protocols were approved by the Shanghai Children's Medical Center Animal Care and Use Committee (SCMC-LAWEC-2020-010). The rat model of heart transplantation was established as previously described (1). The grouping criteria were based on the age and genotype of the donor rats. The sample size was determined on the basis of previous reports and our past experience using this animal model. For the *Cirbp* agonist experiment, animals were randomized into treatment or control group using simple randomization method. The principal researchers were blinded from the group allocations when functional experiments were conducted. To eliminate the influence of estrogen on hypothermic cardioprotection, we only adopted male rats in animal studies. Detailed protocol was described below. The experiments were conducted under room temperature. The donor hearts were harvested from 10-week-old or 1-year-old male rats. Each rat was anesthetized with isoflurane (5%) and maintained by the mask (3% with an O<sub>2</sub> flow of 1 L/min). After performing a median laparotomy, 500 IU heparin dissolved in 1 ml saline were injected into the inferior vena cava for anticoagulation, then the diaphragm was incised and lateral thoracotomy was performed on both sides. The donor heart was exsanguinated by transecting the abdominal vessels. After infusion of UW solution (CoStorSol<sup>®</sup>, University of Wisconsin), the ascending aorta and pulmonary artery were separated through the transvers pericardial sinus. Ligate the superior and inferior vena cava and the pulmonary veins and extract the heart. The donor heart was further perfused by heparin saline and UW solution, and was store at 4°C for 6 hours. Then, 10-week-old male rats were used as recipient. The anesthesia procedures and median laparotomy were performed on recipient rat. The intestines were moved to the left side outside the abdomen and placed on a moist compress. Blunt dissection of adipose tissue from abdominal aorta and inferior vena cava below renal vessel level. Elevate the abdominal vessels and position the Cooley vascular clamp on it. Then a longitudinal incision was created on the vessels and it was flushed with heparin saline. Anastomose the ascending aorta of the donor heart with the abdominal aorta of the recipient, and then anastomose the pulmonary artery of the donor heart with inferior vena cava of the recipient with 8-0 running sutures. The donor heart gradually resumed sinus rhythm after releasing the Cooley vascular clamp. The time from the beginning of donor reperfusion to its recovery of sinus rhythm was recorded. After 30 min of reperfusion, the beating score was assessed according to the Stanford cardiac surgery laboratory graft scoring system (0: no contraction; 1: contraction barely palpable; 2: obvious decrease in contraction strength, but still contracting in a coordinated manner, rhythm disturbance; 3: strong, coordinated beat but noticeable decrease in strength or rate, distention/stiffness; or 4: strong contraction of both ventricles, regular rate, no enlargement or stiffness). At 1 or 7 days after transplantation,

cardiac catheterization was performed, during which a stab wound in heart apex was made in transplanted hearts with 28-gauge needle. Then a 2F Millar catheter (Millar Inc, Houston) was inserted through the wound and the hemodynamic performance was recorded. The data were analyzed using LabChart 8.0 software (AD INSTRUMENTS, Australia).

### **Human cardiac specimens**

The human studies conformed to the principles outlined in the Declaration of Helsinki and were approved by Shanghai Children's Medical Center Research Ethics Committee (SCMCIRB-K2022119-1). Cardiac specimens from human donor hearts were obtained and provided by Organ Procurement Organizations in Guangxi province (n=7, <35 years old; and n=5, >35 years old). Due to remote locations, suitable heart recipients could not be found for these donor hearts. Left ventricle tissues (approximately 500 mg net weight) were harvested after the organ donors were diagnosed with brain death. Informed consent was obtained from the families of all donors and they agreed with that these specimens could be used for scientific research. The patient characteristics are summarized in Supplemental Table 1.

### **Generation of *Cirbp*-KO rats**

*Cirbp*-KO rats were produced by using transcription activator-like effector nuclease (TALEN)-based genome editing techniques. TALEN constructs specific for the rat *Cirbp* gene were designed to target its exon (Repeat variable diresidue: TGCCTCTCTCCTGCAGTGGTggtggtaaaggacagggAGACTCAACGATCCGA; Rat Genome Database ID: 620756; Chr7: 12571310-12575127 reverse strand). TAL Effector Nucleotide Targeter 2.0 (<https://tale-nt.cac.cornell.edu/>) did not predict off-target site. TALEN expression vector was constructed by incorporating the TALEN construct into pCDNA3.1-TALEN plasmid. The expression vector was tested for integrity and then linearized and transcribed into mRNA and then microinjected into single-cell rat embryos from SD rats. To collect fertilized eggs, fertile female SD rats (8 to 10 weeks) were induced to super-ovulate by intraperitoneal injection of PMSG (30 IU) and hCG (30 IU). These rats were mated with fertile males and those with detected vaginal plug were selected as egg donors. Microinjected embryos were transferred to the oviduct of pseudo-pregnant rats at the day vaginal plug was detected. Genomic DNA of founder rats was extracted from tail biopsies and screened for TALEN-induced mutations at the target site of the *Cirbp* gene. TALEN target site was amplified using the following primers: forward primer 5'-AGATCTCGGAAGGTGAGGCT-3' and reverse primer 5'-ATCCTCGGGACCGGTTATCA-3'. Genotyping was performed by the sequencing of the PCR products from tail DNA. The founder with 7 bp deletion of the gene was chosen for further breeding. Founder rats were mated with wildtype SD males to produce F1 generation. These rats were backcrossed to SD rats for five generations, which were further intercrossed to produce the homozygous line.

### **Isolation of human cardiomyocytes**

Human cardiomyocytes were isolated as previously described (2). In brief, cardiac tissues were collected from young and aged human donor hearts and were transported in 45 ml 4 °C University of Wisconsin (UW) solution before the isolation procedure. Once the cardiac tissues arrived at the laboratory, they were fragmented into small pieces in a Ca<sup>2+</sup>-free buffer using surgical scissors at room temperature and were then filtered into a 50-ml conical flask containing the enzymatic buffer (275 u/ml collagenase II and 1.2 u/ml protease XXIV). Supernatant was discarded and the remaining chunks were re-incubated in the same enzyme buffer without protease. Cell suspension was passed through a 100-µm filter and centrifuged at 100×g for 1 min and then cardiomyocytes were resuspended in the resuspension buffer for subsequent experiments.

### **Isolation of cardiomyocytes and fibroblasts from neonatal rats**

The cardiomyocytes and fibroblasts were obtained from neonatal Sprague Dawley rats using neonatal heart dissociation kit (no.nc-6031, Cellutron) as previously described (3). Briefly, for each experiment, left ventricular tissues were harvested from 3 neonatal Sprague Dawley rats within 24h after birth. The tissues were minced and digested for 12 min in 10 ml enzyme buffer, then the supernatant was collected in a new tube. 4 ml of new enzyme buffer was added to the remaining tissues and digested for 15min. This digestion steps were repeated for 7-9 times until fully digested. The supernatant collection from each round underwent 1200 rpm, 1 min centrifuge to obtain pellets of digested cells. The pellet was resuspended in culture medium (no.11320033, Gibco) and plated onto 6 cm culture plates. At two hours after initial plating, non-myocyte cells attached to the dish, whereas cardiomyocytes remained in solution. Thus, the unattached cells in culture medium were transferred onto new plates to obtain cardiomyocytes. Furthermore, the attached cells underwent live/dead staining (Fixable viability stain) and fibroblast marker staining (CD90), and then flow cytometry was employed for cell sorting to obtain fibroblasts involving the following steps: gating for cells, gating for single cells, gating for live cells (Fixable viability stain) and gating for CD90-positive cells.

### **In vitro modeling of cold ischemia**

The cold ischemia was imposed by replacing the culture medium with UW solution (CoStorSol<sup>®</sup>, University of Wisconsin) and placing the culture plates within a humidified hypoxia incubator chamber (#27310, STEMCELL) equilibrated with 95% N<sub>2</sub> and 5% CO<sub>2</sub>. Then, the chamber was placed in an incubator and the temperature was set at 4°C. After 6 h of cold ischemia, UW solution was exchanged to culture medium and the culture plates were placed in an incubator with 95% room air and 5% CO<sub>2</sub> at 37°C for 24 h. Then, ferroptosis-related markers and cell viability were evaluated in each group.

### **Cell viability assay**

Cardiomyocytes and cardiac fibroblasts viability were assessed using Cell Counting Kit-8 (C0038, Beyotime) according to the manufacturer's instructions. Briefly, approximately 5,000 cells (100 µL/well) in the cell suspension were seeded in a 96-well plate. Then the plate was subjected to cold ischemia. The CCK-8 solution (10 µL) was subsequently added to each well, and the cells were incubated for indicated time. Finally, the absorbance was measured at 450 nm using a microplate reader.

### **BODIPY 581/591 C11 analysis**

Two days before the experiment,  $2 \times 10^4$  cells per well were seeded into 24-well glass bottom black plate in each well. Then, the cells were subjected to cold ischemia. After cold ischemia, the medium was removed and cells were washed once with DPBS. Cells were then labelled in 1 ml DPBS containing 5 µM BODIPY 581/591 C11 and incubated at 37 °C for 15 min. The label mixture was removed and 1 ml fresh DPBS was added to the cells. Confocal imaging and quantification of BODIPY 581/591 C11 were performed. Red and green fluorescence values were quantified using ImageJ. The BODIPY 581/591 C11 value was calculated as the ratio of the green fluorescence (indicates oxidized probe) to total fluorescence (green + red, indicates oxidized plus reduced probe).

### **Cell death analysis**

Cells were plated in 96-well plates at a density of 2000 cells per well at 2 days before cold ischemia. After cold ischemia, the medium was replaced with fresh medium containing 30 nM SYTOX Green Dead Cell Stain. Then, the plates were immediately transferred to an IncuCyte Zoom imaging system (SARTORIUS)

enclosed in an incubator set to 37 °C and 5% CO<sub>2</sub>. Three images per well were captured in the green and phase channels every 1 hour in a 48-h period, and the ratio of SYTOX Green-positive objects (dead cells) was quantified using Zoom image analysis software (Essen Bioscience).

### **Isolation of cardiomyocytes from transplanted hearts**

The cardiomyocytes were isolated from transplanted hearts by using Langendorff perfusion system as previously described (4). Briefly, the Langendorff perfusion system was filled with 80 mL calcium-free modified Krebs-Henseleit protective solution (CZ0083, Leagene Biotech, China) gassed with 95% oxygen. Then, heat the perfusion system to 37°C and circulate the system for 5 min. Anesthesia the recipient rat with 4% isoflurane and 1 ml of 125 U/ml heparin was injected into its tail vein. After that, the rat underwent euthanasia through CO<sub>2</sub> asphyxiation and the transplanted heart was excised, thoroughly rinsed to remove residual blood in ice-cold saline solution immediately, and then mounted on the Langendorff apparatus by fixing aorta on the connector. Subsequently, the heart was perfused with calcium-free modified Krebs-Henseleit protective solution for 5 min at velocity of 1 drop per second to further eliminate residual blood. Then, the heart was perfused with calcium-free modified Krebs-Henseleit protective solution supplemented with II-type collagenase (LS004176, Worthington, Germany) at a concentration of 250 U/ml. Following a 25-minute Langendorff perfusion of the heart, digestion was terminated by perfusing 5% fetal bovine serum (12484028, Gibco, United States). The heart was then excised, minced, and dispersed. After aspirating the suspension, filter the solution with the digested heart through a nylon mesh (200 μm) into a new 50ml tube. Centrifuge the filtered solution at 29 x g for 3 min. Discard the supernatant and add 6 mL Krebs-Henseleit protective solution including 12.5 μL CaCl<sub>2</sub> (250 μM). Resuspend the pellet through smooth shaking movements. Centrifuge again at 29 x g for 2 min. Discard the supernatant and add 6 mL Krebs-Henseleit protective solution substituted with 25 μL CaCl<sub>2</sub> (500 μM). Dissolve the cell pellet through gentle shaking movements and add 12 mL Krebs-Henseleit protective solution including 120 μL CaCl<sub>2</sub> (1 mM). Centrifuge for a third time at 16 x g for 1 min. Again, remove the supernatant. Mix the cell pellet with the pre-warmed culture medium (AC-1001036, Applied Cell, China). The recalcified cardiomyocytes were then utilized for subsequent experiments.

### **Mitochondrial function assay**

Prepare the culture plate from the Agilent Seahorse XFe24 kit (100777-004, Agilent, United States) and pre-hydrate the sensor cartridges in the culture plate according to the instructions overnight before use. Coat the Seahorse 24-well culture plate with extracellular matrix (354277, Corning, United States). Seed the isolated cardiomyocytes at a density of 5000 cells per well, evenly distributed by groups. Allow the cells to settle at room temperature for 2 hours. Once the cardiomyocytes adhere, wash the cells twice with XF assay medium (103075-100, Agilent, United States). Add 500 μL of XF assay medium for the next experimental steps. Following the instructions provided in the Agilent Seahorse XFe24 kit, sequentially add the XFp cell mito Stress test kit (103015-100, Agilent, United States) to the drug plate. This kit includes Oligomycin, FCCP, and Rotenone. After completing the drug additions, combine the drug plate with the culture plate and place them into the Seahorse XFe24 Analyzer (XFe24, Agilent, United States). After measurement, data were analyzed in Wave software (Agilent Technologies, Inc).

### **In vivo overexpression of *Sp1* in aged donor hearts**

AAV9 vectors used for *Sp1* overexpression were products from Hanbio Biotechnology Co. Ltd (Shanghai, China). The AAV9 vectors carrying rat *Sp1* cDNA with a c-TnT promoter (AAV9-*Sp1*) were used in the

experimental group. The AAV9 vectors carrying the cTNT promoter (AAV9-*null*) were used in the control group. All AAV9 vectors were administered to the aged rats (1-year-old) through myocardial in situ injection for 150  $\mu$ l at a dose of  $1.6 \times 10^{12}$  vg/ml. After 4 weeks, their hearts were harvested for transplantation. The overexpression of *Sp1* in aged donor hearts was verified by western blotting.

#### **In vivo overexpression of *Cirbp* in aged donor hearts**

AAV9 vectors used for *Cirbp* overexpression were products from Hanbio Biotechnology Co. Ltd (Shanghai, China). The AAV9 vectors carrying the cTNT promoter to drive the expression of *Cirbp* and firefly luciferase (AAV9-*Luc-Cirbp*) were used in the experimental group. The AAV9 vectors carrying the cTNT promoter to drive the expression of firefly luciferase (AAV9-*Luc*) were used in the control group. All AAV9 vectors were administered to the aged rats (1-year-old) through myocardial in situ injection for 200  $\mu$ l at a dose of  $1.2 \times 10^{12}$  vg/ml. After 4 weeks, the successfully transfection of AAV9 into hearts in these aged rats was verified by in vivo luciferase imaging and then their hearts were harvested for transplantation. The overexpression of *Cirbp* in aged donor hearts was verified by western blotting.

#### **In vivo overexpression of *Dhodh* in *Cirbp*-knockout young donor hearts**

AAV9 vectors used for *Dhodh* overexpression were products from Hanbio Biotechnology Co. Ltd (Shanghai, China). The AAV9 vectors carrying the cTNT promoter to drive the expression of *Cirbp* and firefly luciferase (AAV9-*Luc-Dhodh*) were used in the experimental group. The AAV9 vectors carrying the cTNT promoter to drive the expression of firefly luciferase (AAV9-*Luc*) were used in the control group. All AAV9 vectors were administered to the *Cirbp*-knockout young rats (10-week-old) through myocardial in situ injection for 120  $\mu$ l at a dose of  $1.3 \times 10^{12}$  vg/ml. After 4 weeks, the successfully transfection of AAV9 into hearts in these *Cirbp*-knockout young rats was verified by in vivo luciferase imaging and then their hearts were harvested for transplantation. The overexpression of *Dhodh* in *Cirbp*-knockout young donor hearts was verified by western blotting.

#### **In vivo overexpression of *Sp1* in *Cirbp*-knockout aged donor hearts**

AAV9 vectors used for *Sp1* overexpression were products from Hanbio Biotechnology Co. Ltd (Shanghai, China). The recombinant AAV9 vectors carrying rat *Sp1* cDNA with a c-TnT promoter (AAV9-*Sp1*) were used in the experimental group. The AAV9 vectors carrying the cTNT promoter (AAV9-*null*) were used in the control group. All AAV9 vectors were administered to the *Cirbp*-knockout aged rats (1-year-old) through myocardial in situ injection for 150  $\mu$ l at a dose of  $1.6 \times 10^{12}$  vg/ml. After 4 weeks, their hearts were harvested for transplantation. The overexpression of *Sp1* in *Cirbp*-knockout aged donor hearts was verified by western blotting.

#### **Echocardiography**

M-mode echocardiography was performed on each rat after transplantation using a small animal echocardiography analysis system (Vevo770, VisualSonics). In brief, rats were anesthetized with isoflurane. The middle part of abdomen was moistened by the ultrasonic coupling agent as previously described (5). The heart rate (HR), left ventricular ejection fraction (EF), left ventricular end-diastolic diameter (LVEDD) and left ventricular end-systolic diameter (LVESD) were measured using a 30-MHz central frequency scan head after capturing the long axis section of the left ventricle. Percent fractional shortening (FS %) was calculated as  $(LVEDD - LVESD) / LVEDD$ .

### **RNA sequencing**

Left ventricular tissues were collected at one day after transplantation. Total RNA was isolated using the Trizol Reagent (Invitrogen Life Technologies), after which the concentration, quality and integrity were determined using a NanoDrop spectrophotometer (Thermo Scientific). Three micrograms of RNA were used as input material for the RNA sample preparations. Sequencing libraries were generated using the TruSeq RNA Sample Preparation Kit (Illumina, San Diego, CA, USA). Briefly, mRNA was purified from total RNA using poly-T oligo-attached magnetic beads. Fragmentation was carried out using divalent cations under elevated temperature in an Illumina proprietary fragmentation buffer. First, strand cDNA was synthesized using random oligonucleotides and SuperScript II. Second, strand cDNA synthesis was subsequently performed using DNA Polymerase I and RNase H. Remaining overhangs were converted into blunt ends via exonuclease/polymerase activities and the enzymes were removed. After adenylation of the 3' ends of the DNA fragments, Illumina PE adapter oligonucleotides were ligated to prepare for hybridization. To select cDNA fragments of the preferred 200 bp in length, the library fragments were purified using the AMPure XP system (Beckman Coulter, Beverly, CA, USA). DNA fragments with ligated adaptor molecules on both ends were selectively enriched using Illumina PCR Primer Cocktail in a 15 cycle PCR reaction. Products were purified (AMPure XP system) and quantified using the Agilent high sensitivity DNA assay on a Bioanalyzer 2100 system (Agilent). The sequencing library was then sequenced on an Illumina Novaseq 6000 by Shanghai Personal Biotechnology Cp. Ltd. Differential expression analysis of mapped RNA-seq data was performed using DESeq Genes with  $P < 0.05$  and fold change  $< 0.67$  or  $> 1.5$  are identified as differentially expressed genes (DEGs). The pathway enrichment analyses of the differentially expressed genes were performed using Metascape (<http://metascape.org>) based on Kyoto Encyclopedia of Genes and Genomes (KEGG) pathway database. The data for RNA-sequencing are available in the National Center for Gene Expression Omnibus through series accession No. GSE227005.

### **TMT-based quantitative proteomics**

Left ventricular tissues were harvested at one day after heart transplantation. The proteins from each sample were precipitated with acetone and redissolved in the triethylammonium bicarbonate buffer. Then, proteins were quantified by BCA protein assay kit (no. p0010, Beyotime) and about 100  $\mu\text{g}$  of proteins were digested to peptides. The peptides were further labeled with TMT. Then the sample was fractionated using a C18 column on a Rigol L3000 HPLC system. For transition library construction, shotgun proteomics analyses were performed using an EASY-nLCTM 1200 UHPLC system (Thermo Fisher) coupled with a Q Exactive<sup>TM</sup> series mass spectrometer (Thermo Fisher). The resulting spectra from each run were searched separately by the search engines: Proteome Discoverer 2.2 (Thermo Fisher). In order to improve the quality of analysis results, the software PD 2.2 further filtered the retrieval results: Peptide Spectrum Matches (PSMs) with a credibility of more than 99% was identified PSMs. Differentially expressed proteins were selected according to following criteria: (1)  $P < 0.05$ ; (2) fold change  $< 0.83$  or fold change  $> 1.2$ . The proteins with significant differences between two groups were used for volcanic map analysis and Ingenuity pathway analysis. The proteins with significant differences are listed in Supplemental Table 2. The mass spectrometry proteomics data have been deposited to the ProteomeXchange Consortium via the iProX partner repository with the dataset identifier PXD044088.

### **Chromatin immunoprecipitation (ChIP)**

Chromatin extracts were prepared from cardiac tissues of wild-type rats and aged rats. ChIP assays were performed using an EZ-Magna ChIP<sup>TM</sup> A/G Chromatin immunoprecipitation Kit (no. 17-10086, Millipore)

according to the manufacturer's instructions. Briefly, tissues were crumbled into pieces and fixed with formaldehyde, chromatin was isolated, and DNA was sheared into fragments by ultrasonic wave. The fragments were incubated with an SP1-specific antibody (4ug per ChIP, no. 21962-1-AP, proteintech) overnight at 4°C, after which the cross-linking was reversed, and proteins were digested with proteinase K. Then the purified DNA fragments were subjected to high-throughput sequencing based on a protocol from Myers Laboratory at Stanford University (<http://www.hudsonalpha.org/myers-lab/protocols/>). Library preparation and next-generation sequencing were performed by Novogene Biotechnology Corporation. Clean pair-end reads with high quality were mapped onto the rat genome with Bowtie2 algorithm (v.2.2.6). Only unique mapped reads were kept for subsequent analysis when reads mapped to multiple genomic positions. SP1-binding peak regions across the whole genome were extracted using MACS2 software (v.2.1.0). A signal density heatmap for enriched regions was calculated by deeptools (v.3.4.3) from .bam files. Potential binding sites of SP1 were determined by ChIP-sequencing, and then Real-time qPCR was performed using life Technology ABI 7500 System with primers flanking the GC box site at the *Cirbp* promoter region (5'-AATCTGAGGCGTCCGATTGG-3' and 5'-TCACACACCCAAGCTTCCTAAC-3') using a SYBR Green-based PCR kit (no. A25742, Thermo Fisher Scientific). The data for ChIP-sequencing are available in the National Center for Gene Expression Omnibus (GEO) through series accession No. GSE227005.

### **Biotin pulldown assay**

The RNA pulldown analysis was conducted as previously described (6). The biotin labeled RNA probes were synthesized by CLOUD-SEQ Company (Shanghai, China). The labeled probe contained 3'-UTR *Dhodh* mRNA fragments and the negative control probe contained the reverse sequence of positive probes. The RNA-Dhodh probe: Biotin-GGATGGGACTTCTGGCACGTATGGTCACCTCCGATGATCTGCTCC AAT; and the negative control probe: Biotin-ATTGGAGCAGATCATCGGAGGTGACCATACGTGCCAG AAGTCCCATCC. The tissues harvested and washed with PBS twice and incubated in lysis buffer on ice for 10 min. The lysates were precleared by centrifugation. The probes were incubated with streptavidin-coated magnetic beads to generate probe-coated magnetic beads. The lysates were incubated with probe-coated beads and washed with the washing buffer. The RNA complexes bound to the beads were eluted and subjected to western blot.

### **UV cross-link RNP-IP assays**

RIP was performed according to standard protocol (7). Cardiac tissues were exposed to 254nm UV (400 mJ/cm<sup>2</sup>), and whole lysates were prepared for immunoprecipitation using anti-CIRBP (5 µg, no. 10209-2-AP, Proteintech) and anti-IgG antibodies. Briefly, 75 µl Protein-G-DYNA beads were incubated with 5 µg CIRBP antibody (overnight, 4°C) and washed three times with NT2 buffer (50 mM Tris-HCl (pH 7.5), 150 mM NaCl, 1 mM MgCl<sub>2</sub>, 0.05% NP-40), then added the lysates (100 mg) to Ab-beads and incubated for overnight at 4°C. The immunoprecipitated materials were washed five times with IP washing buffer (50 mM HEPES (pH 7.5), 300 mM KCl, 1 mM MgCl<sub>2</sub>, 0.05% NP40, 0.5 mM DTT). Then the materials were treated with NT2 buffer, Dnase I (2 U/ml), SDS (1%), 15 µl proteinase K and 5ul RNase inhibitor (30 min, 55°C). A magnetic rack is used to collect IP products. After purification of RNA with phenol chloroform, the transcripts present in the RNP complexes were analyzed by real-time qPCR. The primer sequences for RT-PCR were listed as below: *Dhodh* forward: 5'- GGCTAGCTGTTCGAGTCACC -3'; reverse: 5'- CCAAAGCCCAGCTTGTAGAG-3'.

### **RNC mRNAs-qPCR**

Ribosome nascent-chain complex-bound (RNC) mRNAs-qPCR is based on the Polysome profiling method (8). In brief, the lysates were treated with cycloheximide to inhibit translation. Then the ribosome components were separated from the free mRNA and other cellular components by superspeed freezing centrifugation using a single concentration of sucrose solution buffer. RNC-mRNA can be obtained by extracting RNA in precipitation with phenol chloroform. At last, the transcripts were analyzed by real-time qPCR. The primer sequences for RT-PCR were listed as below: *Dhodh* forward: 5'-GGCTAGCTGTTTCGAGTCACC -3'; reverse: 5'- CCAAAGCCCAGCTTG TAGAG-3'.

### **Cardiac arachidonic acid metabolites**

All cardiac tissues were detected by ultra-performance liquid chromatography-mass spectrometry (UPLC-MS/MS, Agilent, USA). About 50 mg cardiac muscle samples were taken, weighed and added with grinding magnetic beads, followed by 500  $\mu$ L of cold methanol, 10  $\mu$ L of BHT methanol solution (4.8 g/100mL) and 50  $\mu$ L of internal standard methanol solution (PGE2-D4 50 ng/mL, 5-HETE-D8 50 ng/mL). Then, the samples were homogenized using a tissue grinder (50 Hz, 90 s), and were extracted twice by adding cold methanol. After centrifugation (12000 rpm, 4°C, 10 min), the supernatant was dried, redissolved with 150 $\mu$ L methanol, diluted with pure water until the methanol content was less than 15%, and enriched in SPE column. After drying, the receiving solution was redissolved with 50  $\mu$ L methanol, filtered by 0.22  $\mu$ m filter membrane, and finally detected by UPLC-MS/MS. Data were collected and analyzed using Mass Hunter software (version B.08.00, Agilent, USA). Retention time and MRM ion pairs were qualitatively compared with the standards, and internal standard method was used for quantification.

### **Cardiac oxidative parameters assay**

Cardiac oxidative parameters and iron content were detected using commercially available assay kits, according to the manufacturer's instructions (4-HNE, no. D751041-0096, Sangon; MDA, no. S0131, Beyotime; Iron content, no. BC4355, Solarbio)

### **Serum concentrations assay**

Serum concentrations of cardiac enzymes were detected using commercially available ELISA kits, according to the manufacturer's instructions (cTNI, no. SEKR-0048, Solarbio; cTNT, no. SEKR-0047, Solarbio; CK, BC1140, Solarbio).

### **Histological analysis**

The harvested cardiac tissues were fixed overnight in 4% paraformaldehyde buffer. Cardiac tissue was paraffin-embedded and sectioned at 4-5  $\mu$ m. Then, sections were stained with H&E, PTAH and Prussian blue by using commercially available kits (no. DH0003, Leagene; no. DC0001, Leagene; G1424, Solarbio), according to the manufacturer's instructions.

### **Apoptosis analysis**

Tissue sections were prepared after dewaxing, hydrate by graded ethanol and antigen retrieval using citrate. TUNEL staining was performed using an in-situ cell death detection kit (no. 11684795910, Roche) according to the manufacturer's protocol. The apoptotic index was measured by counting puncta of TUNEL signal in 100 randomly selected actinin-positive cells in multiple fields chosen randomly at 400 $\times$  magnification. Images were captured by a laser-scanning confocal microscope (SP8, Leica).



### **Searching sequences matched with CIRBP binding motif in the 3' UTR region of *Dhodh* mRNA**

A 51-nucleotide motif was identified as the CIRBP binding motif in a previous study (9). We scanned this motif in the 3'-UTR region of *Dhodh* mRNA by the FIMO software as previously described (10). The results showed that there are four matched sequences (Supplemental Table 3)

### **Immunofluorescence staining in cardiac tissues**

The immunofluorescence was performed following a standard protocol as previously described (11). Briefly, after dewaxing, hydration and antigen retrieval, paraffin-embedded sections were blocked with 5% serum from goat for 2 hours and incubated with primary antibodies overnight at 4°C. Some sections were incubated with IgG to test the specificity of antibodies at same time. Then, sections were stained with fluorochrome-conjugated secondary antibodies for 60 min. Images were captured by a laser-scanning confocal microscope (SP8, Leica). The fluorescence intensity and area were measured by Image J software (version 1.52a). The MPO-positive number was determined by counting puncta of MPO signals in 3 randomly selected views. The primary antibodies were listed in supplementary Supplemental Table 4.

### **Immunofluorescence staining in cardiomyocytes**

The immunofluorescence was performed following a standard protocol as previously described (7). Briefly, cardiomyocytes were fixed in 4% paraformaldehyde. Thereafter, cardiomyocytes were blocked with 5% serum from goat for 2 hours and incubated with primary antibodies overnight at 4°C. Some cardiomyocytes were incubated with IgG to test the specificity of antibodies at same time. Then, cardiomyocytes were stained with fluorochrome-conjugated secondary antibodies for 60 min. Images were captured by a laser-scanning confocal microscope (SP8, Leica). The fluorescence intensity and area were measured by Image J software (version 1.52a). The primary antibodies were listed in Supplemental Table 4.

### **RT-PCR analysis**

Total RNA was extracted using the Trizol reagent (no. 15596018, Thermo Fisher Scientific). Reverse transcription was performed using a Primescript RT reagent kit (no. RR047Q, Takara) and RT-PCR was performed using life Technology ABI 7500 System based on SYBR-Green PCR kit (no. A25742, Thermo Fisher Scientific). The  $\Delta\Delta C_t$  method was used for the calculation of relative changes in gene expression. The primer sequences for RT-PCR were listed as below: *Cirbp* forward: 5'-GGTCTCAGCTTCGACACCAA -3'; reverse: 5'- TCCCATCCACAGACTTCCCA -3'. *Dhodh* forward: 5'-CCGAGGACCAAGCTGTCATT-3' and reverse: 5'-GTAAGGGCGTACATCTCCCG-3'. *Gapdh* forward: 5'- CTCTCTGCTCCTCCCTGTTC -3'; reverse: 5'- GCCAAATCCGTTACACCG -3'.

### **Cytosolic and nuclear proteins extraction**

Cytoplasmic and nuclear proteins were extracted from cardiac samples using commercially available assay kits according to the manufacturer's instructions (Minute<sup>TM</sup>, no. NT-032, Invent).

### **Western blot analysis**

Western blot analysis was performed following a standard protocol as previously described (7). Briefly, total proteins of tissues and cells were extracted using RIPA buffer with protease inhibitors (Roche). For immunoblot analysis, protein samples were resolved by SDS-PAGE and transferred onto nitrocellulose membranes by an iBlot 2 dry blotting system (Thermo Fisher Scientific). Membranes were blocked in 5% non-fat dry milk in TBST (100 mmol/L Tris, pH 7.5, 0.9% NaCl, 0.1% Tween-20) for 1 hour and incubated

with primary antibodies overnight at 4°C. Membranes were washed 3 times with TBST and incubated for 1 hour with horseradish peroxidase-labeled secondary antibody at room temperature. After rinsing, enhanced chemiluminescent substrate (no. WBKLS0500, Millipore) was used to develop the membranes. Amersham Imager 600 (GE) was used to capture and analyze the band intensities. The primary antibodies were listed in Supplemental Table 5.

### **Transmission electron microscope (TEM)**

Samples of myocardium (1 mm×1 mm×2 mm) were quickly removed from the left ventricle and immediately fixed with 2.5% glutaraldehyde overnight at 4°C for 48 hours. The fixed tissues were then dehydrated with ethanol and embedded in ultra-thin sections. After the sections were counterstained with uranyl acetate and lead citrate, they were observed under the transmission electron microscope (HT7500, Hitachi, Japan). Five random fields from each sample were screened, and the abnormal mitochondria with mitochondrial shrinkage, mitochondrial exacerbated crista loss and mitochondrial membrane rupture were preserved.

### **CoQ and CoQH<sub>2</sub> analysis**

The frozen tissue was cut on dry ice and weighted ( $20 \pm 2$  mg). For cell experiments, a minimum of  $8 \times 10^6$  cells need to be collected. The samples were spiked with 100  $\mu$ L 96% ethanol containing BHT and 100 ng/mL CoQ10-d9 as internal standard, and homogenized in the frozen state by using a TissueLyser with zirconia beads at 40 Hz for 4 min. The homogenates were centrifuged at 15000 g and 4 °C for 15 min, and the supernatant was collected and evaporated to dryness under nitrogen. The dry residue was reconstituted in 50  $\mu$ L ethanol prior to performing UHPLC-MS/MS analysis. The quality control (QC) sample was obtained by isometrically pooling all the prepared samples. The samples of calibration curves were prepared for ubiquinone and ubiquinol, respectively. The UHPLC-MS/MS analysis was performed on an Agilent 1290 Infinity II UHPLC system coupled to a 6470A Triple Quadrupole mass spectrometry (Santa Clara, CA, United States). Samples was injected onto a Thermo Fisher Acclaim C30 column (100 mm  $\times$  2.1 mm, 3  $\mu$ m) at a flow rate of 0.3 mL/min. The mobile phases consisted of (A) 60% acetonitrile and (B) isopropanol/acetonitrile (9:1, v/v), both with 10mM ammonium formate. The chromatographic separation was conducted by a gradient elution program as follows: 10% B at 0-0.5 min, 70% B at 1.5 min, 90% B at 8 min, 100% B at 8.5 min and held to 9.5 min, 10% B at 9.6 min and held to 11min. The eluted analysts were ionized in an electro spray ionization source in positive mode (ESI+). The temperatures of source drying gas and sheath gas were 300 °C and 350 °C. The flow rates of source drying gas and sheath gas were 5 and 11 L/min, respectively. The pressure of nebulizer was 45 psi, and capillary voltage was 4000 V. Multiple reaction monitoring mode was applied to determine ubiquinone (880.7->197 for quantification and 880.7->95 for qualification) and ubiquinol (882.7->197 for quantification and 882.7->95 for qualification). The Agilent MassHunter software (version B.08.00) was used to control instruments and acquire data. The raw data were processed by MassHunter Workstation Software (version B.08.00, Agilent) by using the default parameters and assisting manual inspection to ensure the qualitative and quantitative accuracies of each compound. The peak areas of each compound in all samples were integrated. Calibration curves of 11-point were constructed by plotting the peak area ratio of each compound to internal standard against concentration of each compound. The molar amount of ubiquinone (oxidized CoQ10) in the ubiquinol (reduced CoQ10) sample was firstly calculated using the calibration curve of ubiquinone, and then the true molar concentration of ubiquinol, after subtracting the ubiquinone molar concentration from the nominal value of ubiquinol sample, was used to plot the calibration curves of ubiquinol. The ubiquinone (CoQ) and ubiquinol (CoQH<sub>2</sub>) contents (nmol/g wet tissue) of raw sample were quantified in Excel software.

## Supplementary references

1. Ono K, Lindsey ES. Improved technique of heart transplantation in rats. *J Thorac Cardiovasc Surg.* 1969;57(2):225-229.
2. Guo Gr, et al. A modified method for isolation of human cardiomyocytes to model cardiac diseases. *J Transl Med.* 2018;16(1):288.
3. Shi B, et al. Targeting gut microbiota-derived kynurenine to predict and protect the remodeling of the pressure-overloaded young heart. *Sci Adv.* 2023;9(28):eadg7417.
4. Nippert F, et al. Isolation and Cultivation of Adult Rat Cardiomyocytes. *J Vis Exp.* 2017;128:56634.
5. Liu Y, et al. Effect of chronic left ventricular unloading on myocardial remodeling: Multimodal assessment of two heterotopic heart transplantation techniques. *J Heart Lung Transplant.* 2015;34(4):594-603.
6. Min X, et al. A circular intronic RNA ciPVT1 delays endothelial cell senescence by regulating the miR-24-3p/CDK4/pRb axis. *Aged Cell.* 2022;21(1):e13529.
7. Liu Y, et al. Chronic hypoxia-induced *Cirbp* hypermethylation attenuates hypothermic cardioprotection via down-regulation of ubiquinone biosynthesis. *Sci Transl Med.* 2019;11(489):eaat8406.
8. Wang T, et al. Translating mRNAs strongly correlate to proteins in a multivariate manner and their translation ratios are phenotype specific. *Nucleic Acids Res.* 2013;41(9):4743-4754.
9. Yang R, et al. Functional significance for a heterogenous ribonucleoprotein A18 signature RNA motif in the 3'-untranslated region of ataxia telangiectasia mutated and Rad3-related (ATR) transcript. *J Biol Chem.* 2010;285(12): 8887-8893.
10. Grant CE, et al. FIMO: scanning for occurrences of a given motif. *Bioinformatics.* 2011; 27(7): 1017-1018.
11. Liu Y, et al. Suppression of Myocardial Hypoxia-Inducible Factor-1 $\alpha$  Compromises Metabolic Adaptation and Impairs Cardiac Function in Patients With Cyanotic Congenital Heart Disease During Puberty. *Circulation.* 2021;2:2254-2272.

## Supplemental Figures

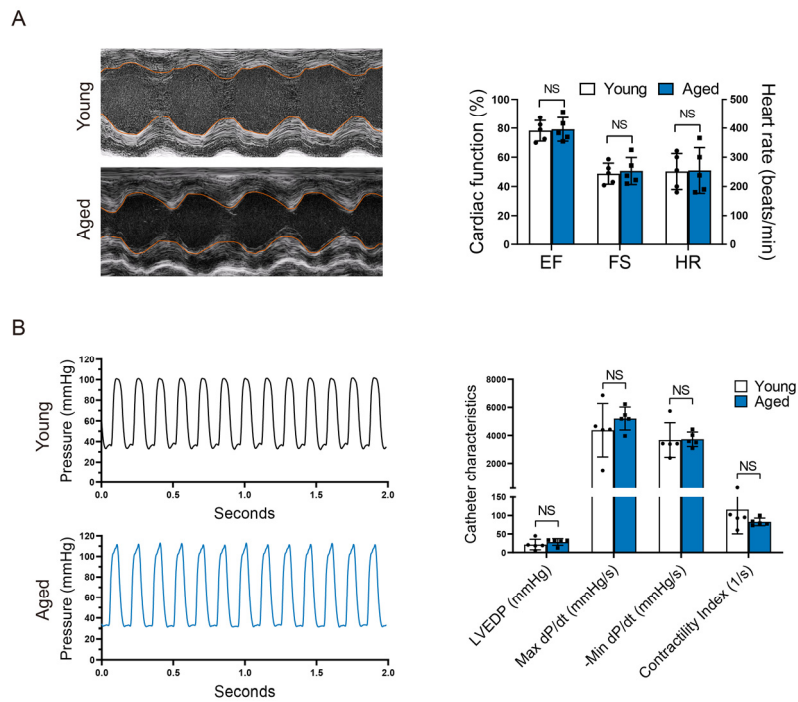

**Supplemental Figure 1. Evaluation of cardiac functions in young and aged donor heart prior to transplantation (A)** Cardiac function of donor hearts measured by echocardiography prior to transplantation. EF, ejection fraction; FS, fractional shortening. **(B)** Representative left ventricular pressure (LVP) traces and cardiac function parameters of donor hearts determined via cardiac catheterization prior to transplantation. LVEDP, left ventricular end-diastolic pressure. Quantitative data are shown as the mean  $\pm$  standard deviation with individual values presented as a dot plot. Statistical significance was analyzed by Student's *t* test (NS, not significant).

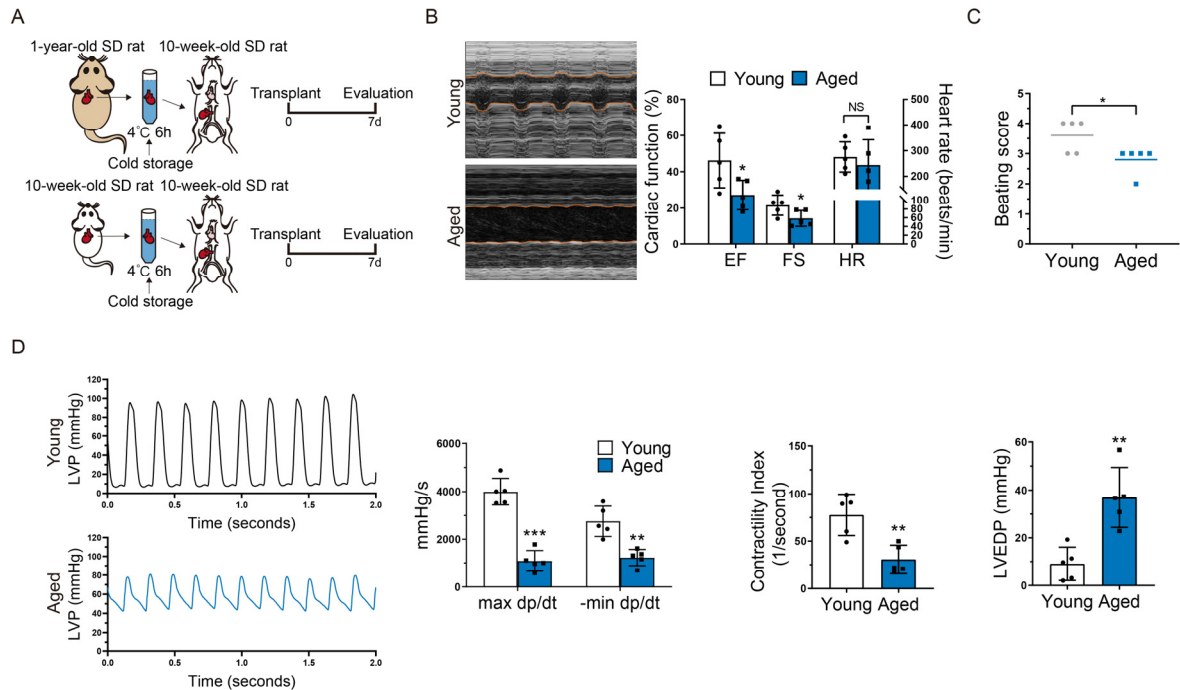

**Supplemental Figure 2. Aged donor hearts showed decreased cardiac functions at 7 days after transplantation.** (A) Experimental design. Donor hearts were harvested from young rats (10-week-old) and aged rats (1-year-old) and then transplanted to young rats (10-week-old) ( $n=5$  in each group). Hypothermia was used to protect the donor hearts during cold storage. The beating score and donor heart function were measured at 7 days after transplantation. SD, Sprague-Dawley. (B) Cardiac function of donor hearts measured by echocardiography at 7 days after transplantation. EF, ejection fraction; FS, fractional shortening; SV, stroke volume; CO, cardiac output; HR, heart rate. (C) Beating score of donor hearts at 7 days after transplantation. (D) Representative left ventricular pressure (LVP) traces and cardiac function parameters of donor hearts determined via cardiac catheterization at 7 days after transplantation. LVEDP, left ventricular end-diastolic pressure. Quantitative data are shown as the mean  $\pm$  standard deviation with individual values presented as a dot plot. Statistical significance of beating score was determined with Mann-Whitney test. Statistical significance of the other parameters was determined with Student's  $t$  test ( $*P < 0.05$ ;  $**P < 0.01$ ;  $***P < 0.001$ ; NS, not significant).

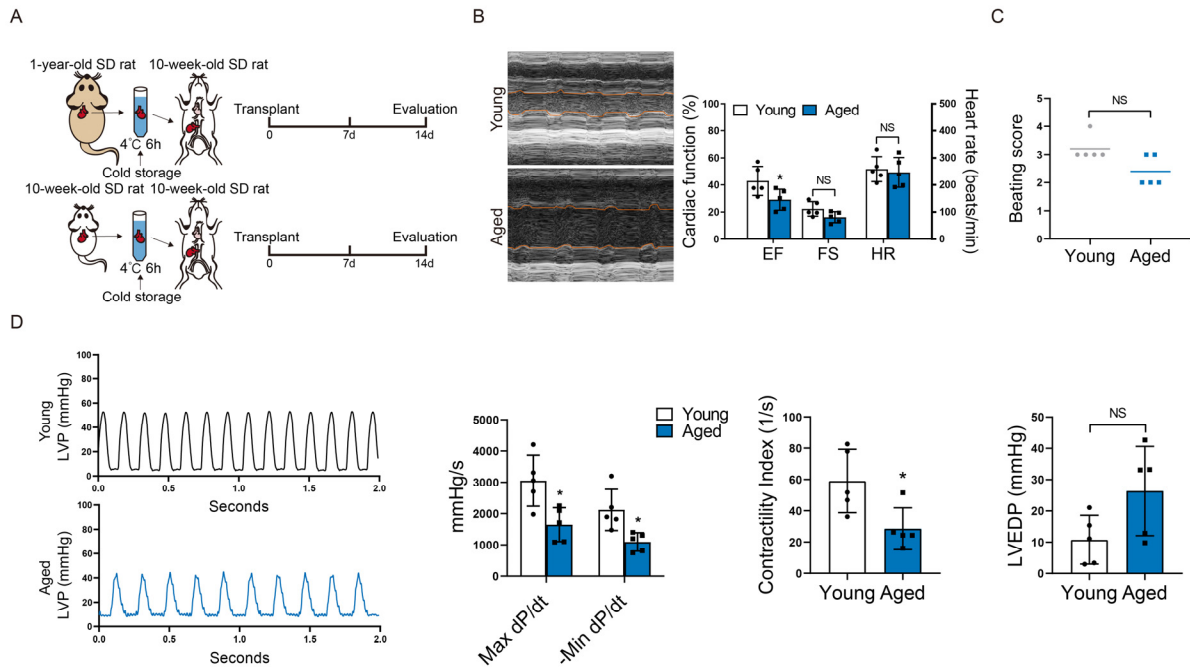

**Supplemental Figure 3. Aged donor hearts showed decreased cardiac functions at 14 days after transplantation.** (A) Experimental design. Donor hearts were harvested from young rats (10-week-old) and aged rats (1-year-old) and then transplanted to young rats (10-week-old) ( $n=5$  in each group). Hypothermia was used to protect the donor hearts during cold storage. The beating score and donor heart function were measured at 14 days after transplantation. SD, Sprague-Dawley. (B) Cardiac function of donor hearts measured by echocardiography at 14 days after transplantation. EF, ejection fraction; FS, fractional shortening; HR, heart rate. (C) Beating score of donor hearts at 14 days after transplantation. (D) Representative left ventricular pressure (LVP) traces and cardiac function parameters of donor hearts determined via cardiac catheterization at 14 days after transplantation. LVEDP, left ventricular end-diastolic pressure. Quantitative data are shown as the mean  $\pm$  standard deviation with individual values presented as a dot plot. Statistical significance of beating score was determined with Mann-Whitney test. Statistical significance of the other parameters was determined with Student's *t* test ( $*P < 0.05$ ; NS, not significant).

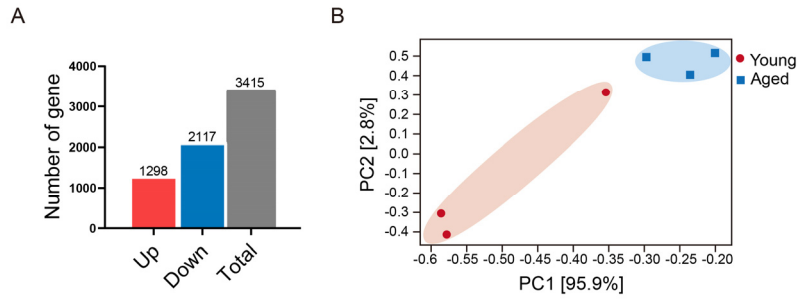

**Supplemental Figure 4. Transcriptomic analysis of the young and aged donor heart after transplantation (A)** The total numbers of genes whose expression were significantly increased or decreased between two groups. **(B)** PCA plots showing the separation of clusters between two groups (n=3 in each group).

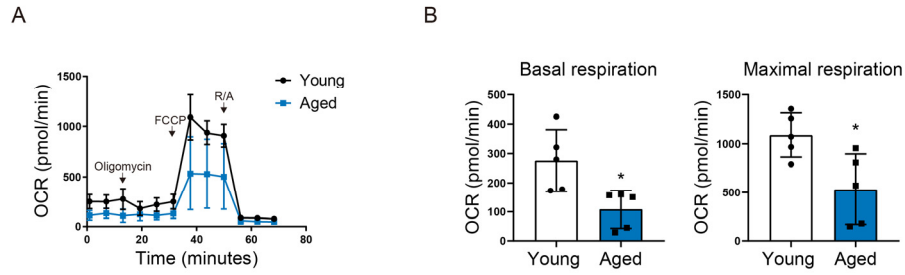

**Supplemental Figure 5. Aged donor hearts showed impaired mitochondrial functions at 1 day after transplantation.** (A) Oxygen consumption rate (OCR) of cardiomyocytes isolated from young or aged donor hearts at 1 day after transplantation. The traces were recorded by XF24 metabolic analyzer and the mitochondrial effectors were injected at time points indicated by downward arrows. (B) Basal respiration and maximal respiration of cardiomyocytes isolated from two groups. Statistical significance was analyzed by Student's *t* test ( $*P < 0.05$ ).



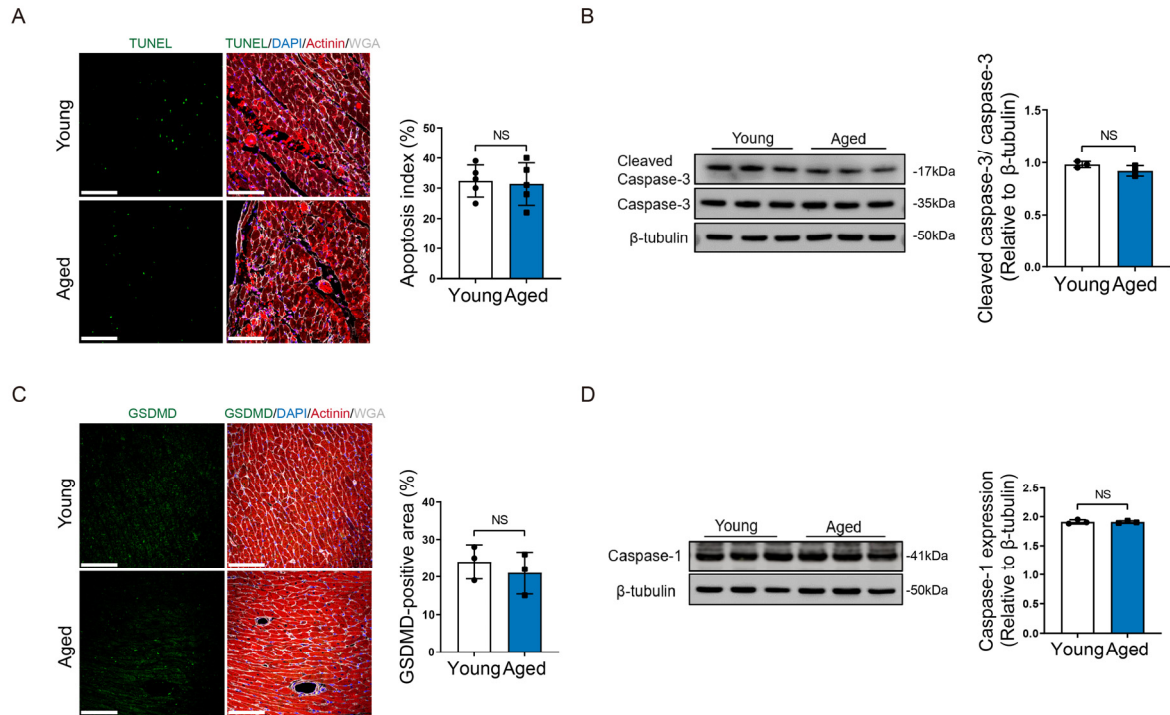

**Supplemental Figure 6. The levels of apoptosis and pyroptosis are comparable between the young and aged donor heart after transplantation.** (A) TUNEL staining in young and aged donor hearts after transplantation. Scale bars, 100  $\mu$ m. The apoptotic index was measured by counting puncta of TUNEL signal in 100 randomly selected actinin-positive cells. (B) Western blot analysis of cleaved caspase-3 and caspase-3 in young and aged donor hearts after transplantation. The graph shows the ratio of cleaved caspase-3 to caspase-3. (C) Immunofluorescence staining of GSDMD in young and aged donor hearts after transplantation. Scale bars, 100  $\mu$ m. (D) Western blot analysis of caspase-1 in young and aged donor hearts after transplantation. Quantitative data are shown as the mean  $\pm$  standard deviation with individual values presented as a dot plot. Statistical significance was analyzed by Student's *t* test (NS, not significant).

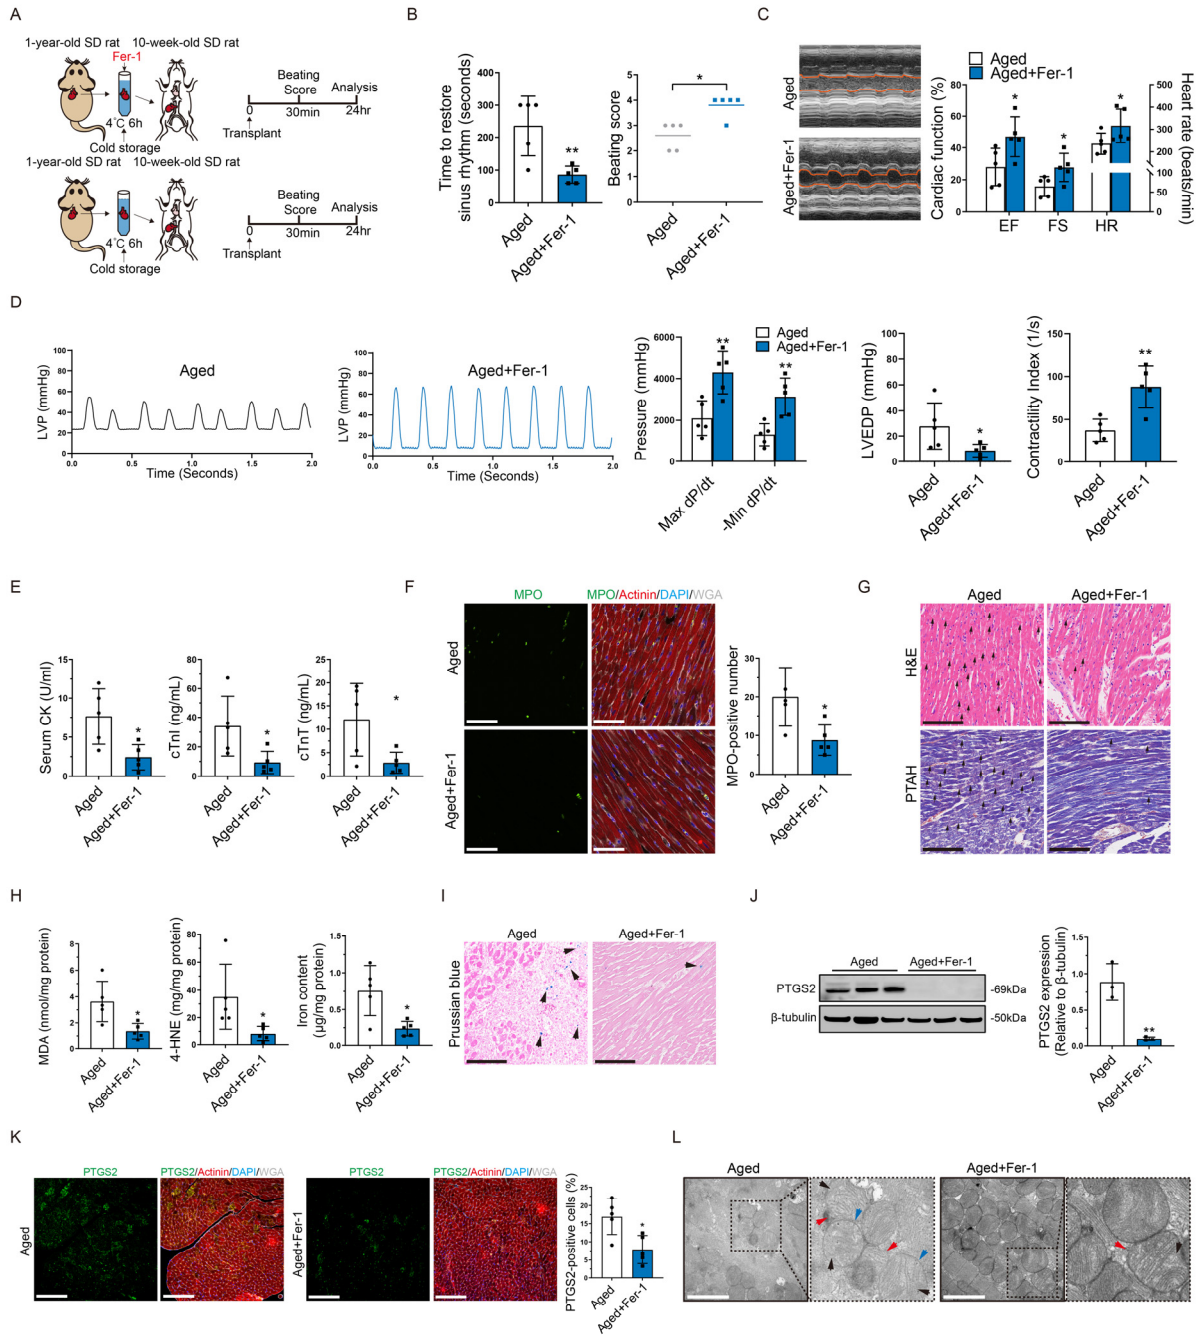

**Supplemental Figure 7. Cardioplegic solution supplemented with another ferroptosis inhibitor also could improve cardioprotection of aged donor heart during cold storage in transplantation. (A)** Experimental design. Donor hearts were harvested from aged rats (1-year-old). UW solution was used to induce cardiac arrest in control group, and the experimental group used UW solution supplemented with another ferroptosis inhibitor, ferrostatin-1 (Fer-1) (n=5 in each group). After 6-hours cold ischemia, donor hearts were transplanted to young rats (10-week-old). Hypothermia was used to protect the donor heart during cold storage. The beating score was evaluated at 30 mins after transplantation. The donor heart functions and myocardial injury indicators were measured at 1 day after transplantation. SD, Sprague-Dawley. **(B)** Assessment of cardiac resuscitation after transplantation. **(C)** Cardiac function of donor hearts measured by echocardiography after transplantation. **(D)** Representative left ventricular pressure (LVP) traces and cardiac function parameters of donor hearts determined via cardiac catheterization after transplantation.

transplantation. LVEDP, left ventricular end-diastolic pressure. **(E)** Serum cardiac enzymes in recipients after transplantation. **(F)** MPO staining of donor hearts after transplantation. Scale bars, 50  $\mu\text{m}$ . **(G)** H&E and PTAH staining of donor hearts after transplantation. The arrows indicate myocardial contraction band necrosis. Scale bars, 100 $\mu\text{m}$  in H&E and 50 $\mu\text{m}$  in PTAH. **(H)** Peroxidation parameters and iron overload in donor hearts after transplantation. **(I)** Prussian blue staining of donor hearts after transplantation. The arrows indicate iron deposition in myocardium. Scale bars, 50  $\mu\text{m}$ . **(J)** Western blotting and quantification of PTGS2 in donor hearts after transplantation. **(K)** Immunofluorescence staining of PTGS2 in donor hearts after transplantation. Scale bars, 100  $\mu\text{m}$ . **(L)** Transmission electron microscopy images of donor hearts after transplantation. Blue arrows indicate mitochondrial shrinkage; Black arrows indicate the mitochondrial crista loss; Red arrows indicate mitochondrial membrane rupture. Scale bars, 1  $\mu\text{m}$ . Quantitative data are shown as the mean  $\pm$  standard deviation with individual values presented as a dot plot. Statistical significance of beating score was determined with Mann-Whitney test. Statistical significance of the other parameters was determined with Student's *t* test (\* $P < 0.05$ ; \*\* $P < 0.01$ ; \*\*\* $P < 0.001$ ; NS, not significant).

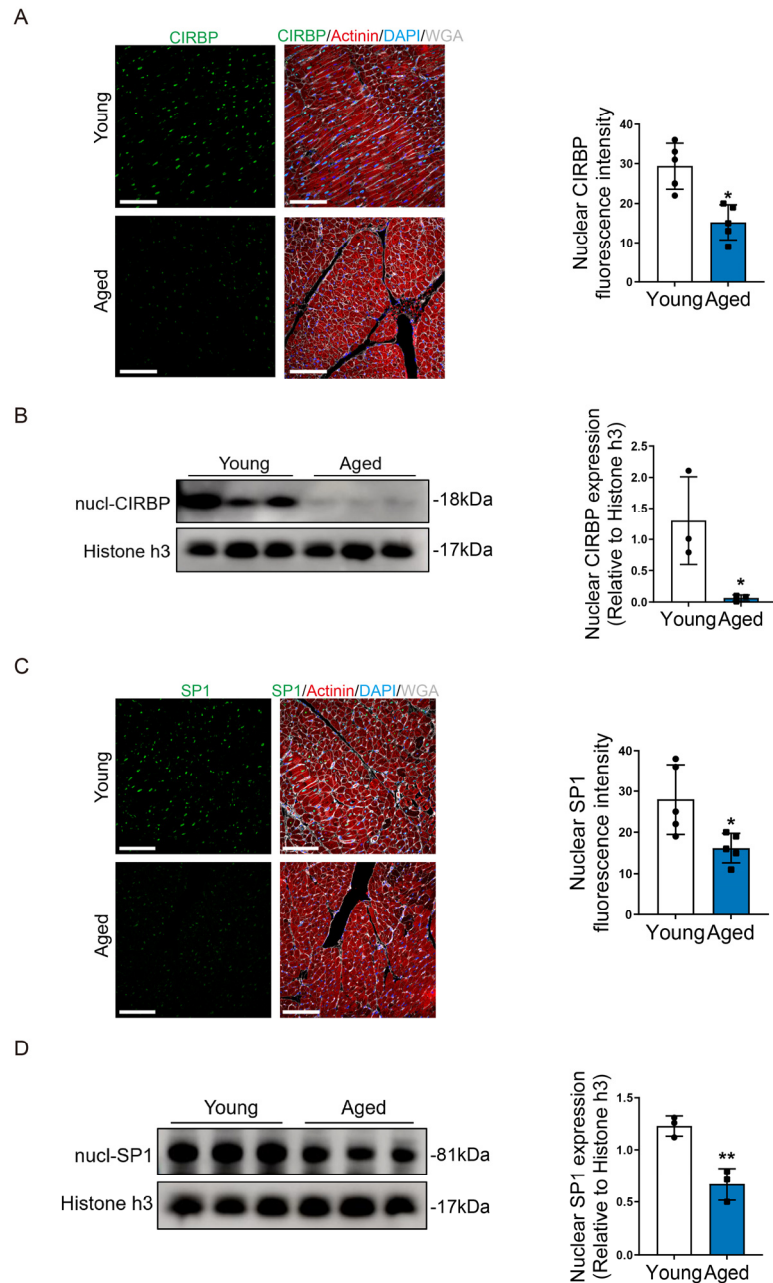

**Supplemental Figure 8. The expression of CIRBP and SP1 in young and aged human donor hearts. (A)** Immunofluorescence staining of CIRBP in young and aged human donor hearts before transplantation. Scale bars, 100  $\mu\text{m}$ . **(B)** Western blotting and quantification of nuclear CIRBP in young and aged human donor hearts before transplantation. **(C)** Immunofluorescence staining of SP1 in young and aged human donor hearts before transplantation. Scale bars, 100  $\mu\text{m}$ . **(D)** Western blotting and quantification of nuclear SP1 in young and aged human donor hearts before transplantation. Quantitative data are shown as the mean  $\pm$  standard deviation with individual values presented as a dot plot. Statistical significance was analyzed by Student's *t* test (\* $P < 0.05$ ; \*\* $P < 0.01$ ).

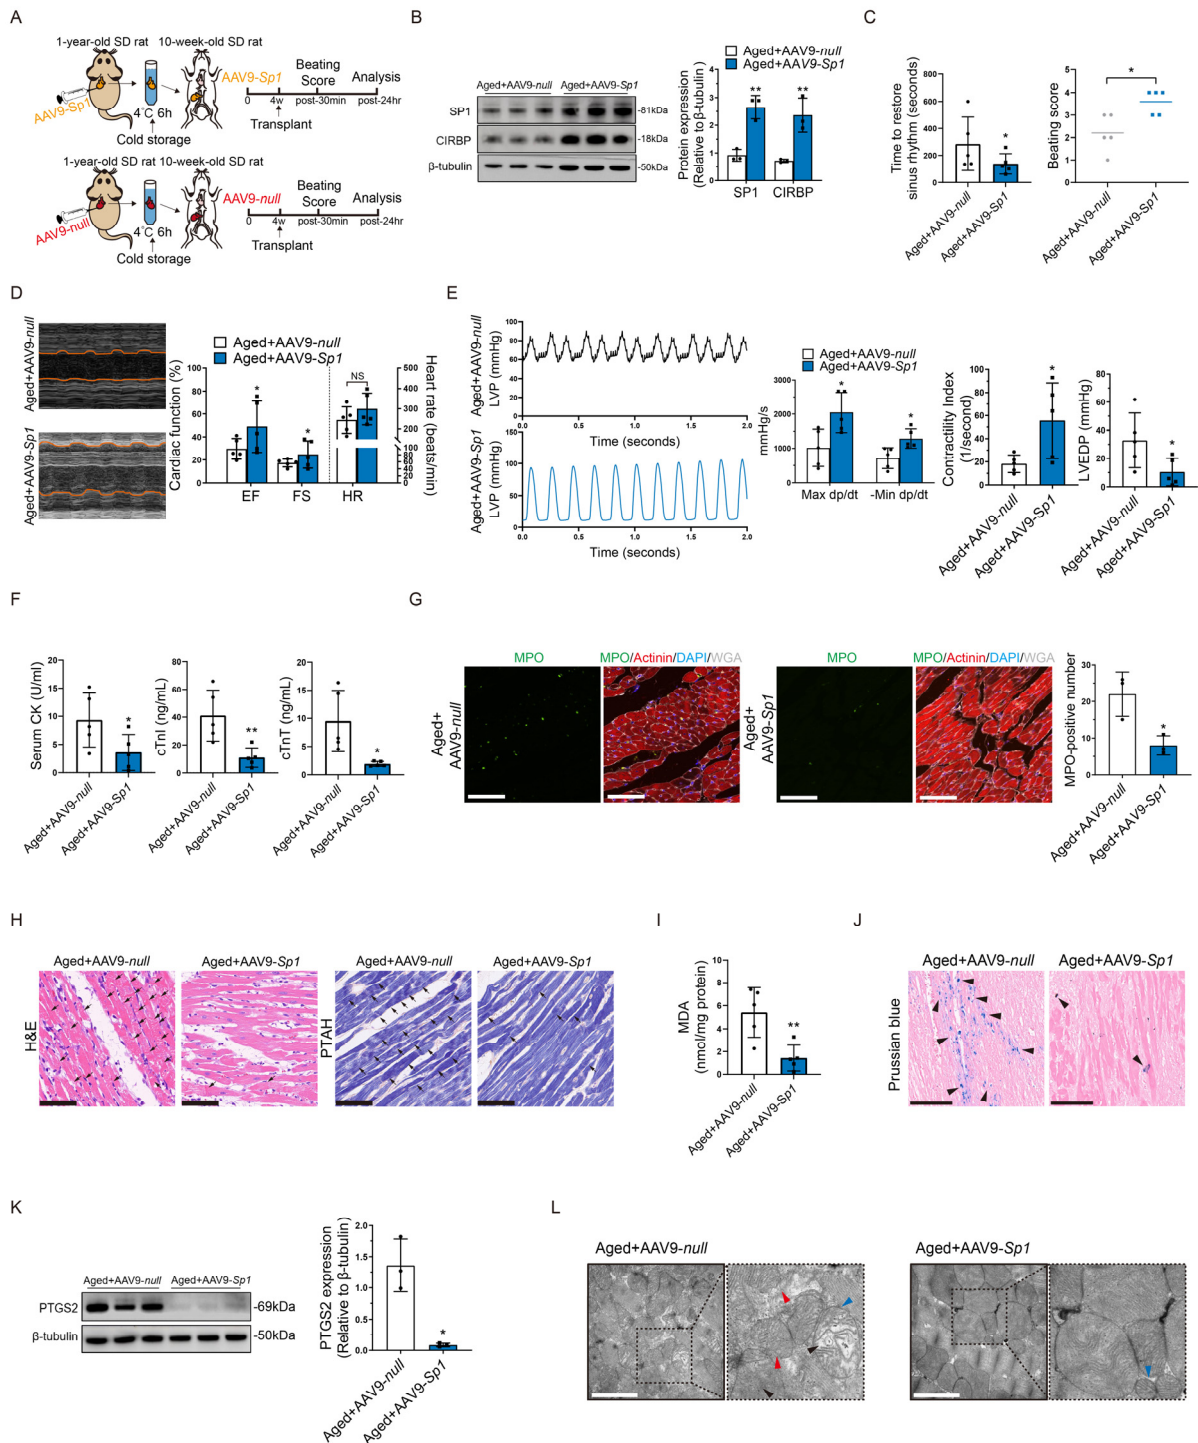

**Supplemental Figure 9. Overexpression of *Sp1* enhances hypothermic cardioprotection in aged donor hearts during cold storage in transplantation.** (A) Experimental design. Aged rats (1-year-old) were injected with AAV9 vectors carrying *Sp1* cDNA (AAV9-*Sp1*) or control vehicles (AAV9-*null*) ( $n=5$  in each group). After 4 weeks, the donor hearts were harvested from two groups and transplanted to the young rats (10-week-old). Hypothermia was used to protect the donor heart during cold storage. The beating score was evaluated at 30 mins after transplantation. The donor heart functions and myocardial injury indicators were measured at 1 day after transplantation. SD, Sprague-Dawley. (B) Western blotting and quantification of SP1 and CIRBP in *Sp1*-overexpressing aged donor hearts. (C) Assessment of cardiac resuscitation after

transplantation **(D)** Cardiac function of donor hearts measured by echocardiography after transplantation. **(E)** Representative left ventricular pressure (LVP) traces and cardiac function parameters of donor hearts determined via cardiac catheterization after transplantation. LVEDP, left ventricular end-diastolic pressure. **(F)** Serum cardiac enzymes in recipients after transplantation. **(G)** MPO staining of donor hearts after transplantation. Scale bars, 50  $\mu\text{m}$ . **(H)** H&E and PTAH staining of donor hearts after transplantation. The arrows indicate myocardial contraction band necrosis. Scale bars, 100 $\mu\text{m}$  in H&E and 50 $\mu\text{m}$  in PTAH. **(I)** Lipid peroxidation in donor hearts after transplantation. **(J)** Prussian blue staining of donor hearts after transplantation. The arrows indicate iron deposition in myocardium. Scale bars, 50  $\mu\text{m}$ . **(K)** Western blotting and quantification of PTGS2 in donor hearts after transplantation. **(L)** Transmission electron microscopy images of donor hearts after transplantation. Blue arrows indicate mitochondrial shrinkage; Black arrows indicate the mitochondrial crista loss; Red arrows indicate mitochondrial membrane rupture. Scale bars, 1  $\mu\text{m}$ . The data shown are the mean  $\pm$  standard deviation with individual values presented as a dot plot. Statistical significance of beating score was determined with Mann-Whitney test. Statistical significance of the other parameters was determined with Student's *t* test (\* $P < 0.05$ ; \*\* $P < 0.01$ ; \*\*\* $P < 0.001$ ; NS, not significant).

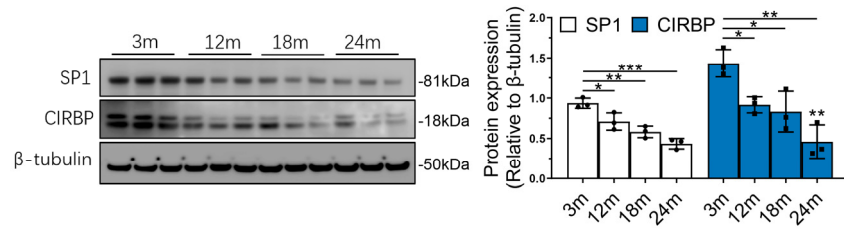

**Supplemental Figure 10. Dynamic changes in expressions of SP1 and CIRBP in donor hearts from rats at different ages.** Quantitative data are shown as the mean  $\pm$  standard deviation with individual values presented as a dot plot. Statistical significance was analyzed by one-way ANOVA followed by Tukey–Kramer multiple-comparisons test (\* $P < 0.05$ ; \*\* $P < 0.01$ ; \*\*\* $P < 0.001$ ).

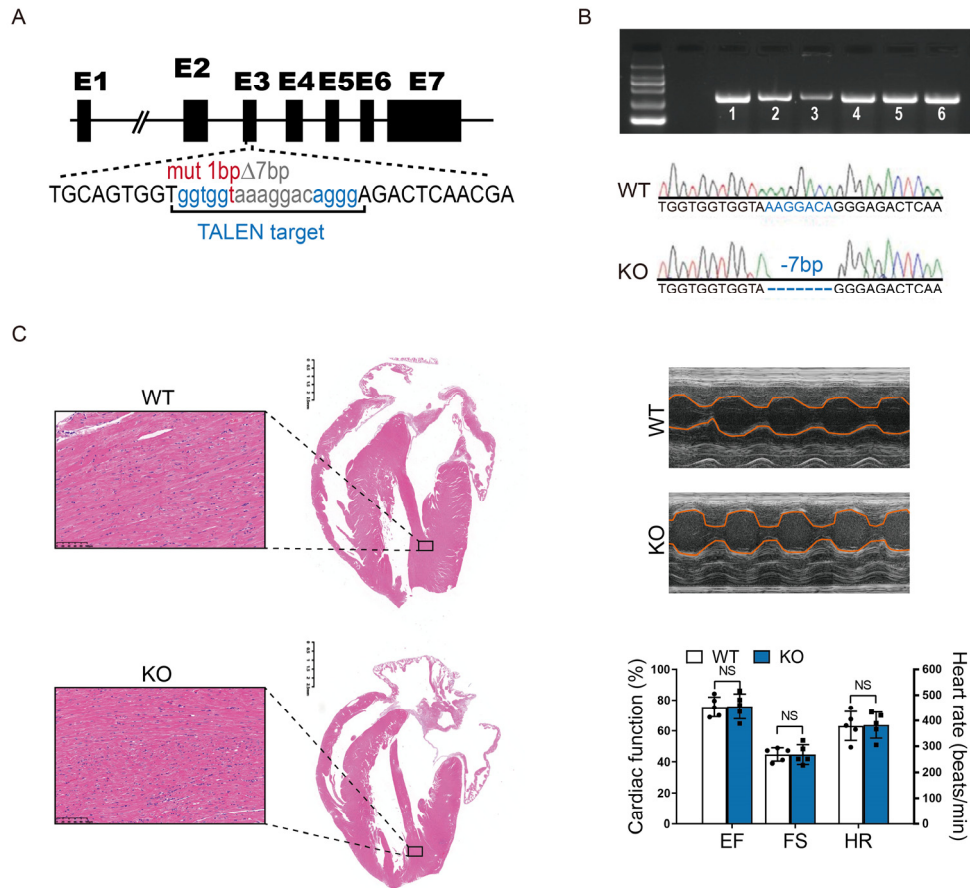

**Supplemental Figure 11. Baseline assessment of cardiac histology and heart function in *Cirbp*-knockout rats.** (A) A 17 bp sequence in the exon 3 of *Cirbp* was chosen as TALEN-target for deletion. (B) Genotyping of *Cirbp*-knockout rats. Upper: Representative gel electrophoresis image of PCR products of *Cirbp*-knockout rats. Lower: Confirmation of successful gene deletion by direct DNA sequencing of PCR products from the upper image. (C) H&E staining in cardiac tissues (original magnification,  $\times 100$ ). scale bar, 100  $\mu\text{m}$ . (D) Echocardiographic evaluation of cardiac function ( $n = 3$  in each group). The data shown are the mean  $\pm$  standard deviation with individual values presented as a dot plot. Statistical significance was analyzed by Student's *t* test (NS, not significant).



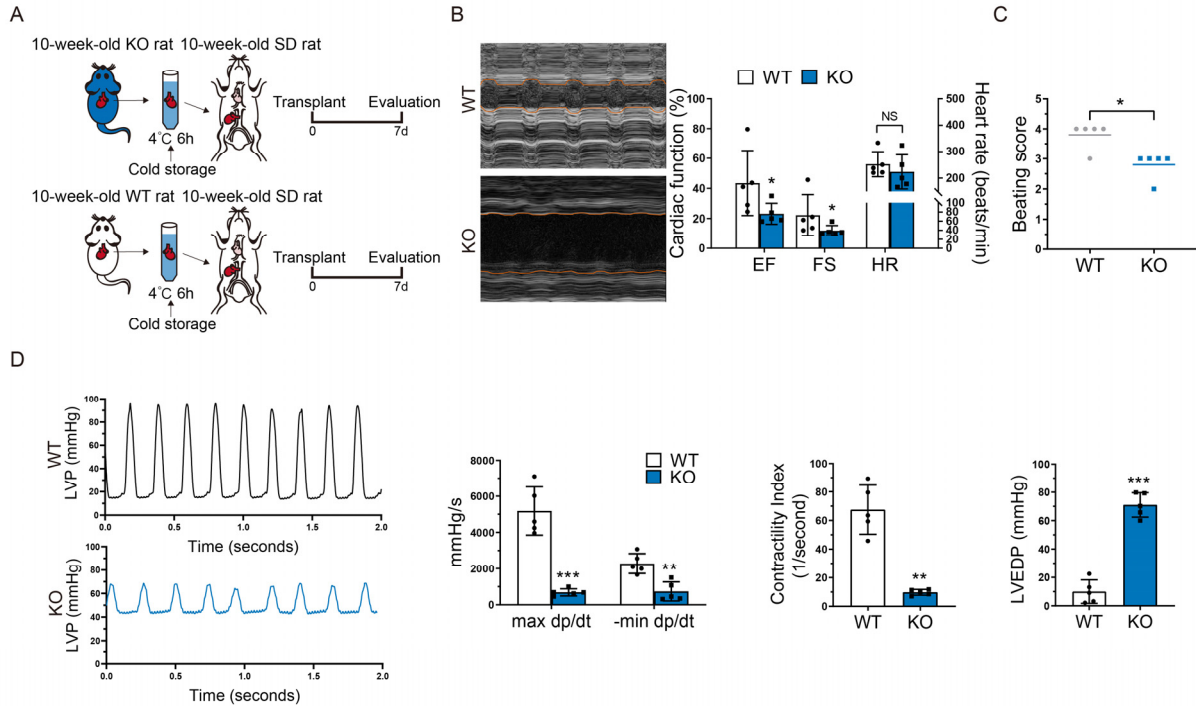

**Supplemental Figure 12. *Cirbp*-knockout young donor heart showed decreased cardiac functions at 7 days after transplantation.** (A) Experimental design. Young donor hearts were harvested from wild-type (10-week-old) (WT) rats and *Cirbp*-knockout (10-week-old) (KO) rats, and were transplanted to wild-type young rats respectively (10-week-old) (n=5 in each group). Hypothermia was used to protect the donor heart during cold storage. The beating score and donor heart function were measured at 7 days after transplantation. SD, Sprague-Dawley. (B) Cardiac function of donor hearts measured by echocardiography at 7 days after transplantation. EF, ejection fraction; FS, fractional shortening; SV, stroke volume; CO, cardiac output; HR, heart rate. (C) Beating score of donor hearts at 7 days after transplantation. (D) Representative left ventricular pressure (LVP) traces and cardiac function parameters of donor hearts determined via cardiac catheterization at 7 days after transplantation. LVEDP, left ventricular end-diastolic pressure. Quantitative data are shown as the mean  $\pm$  standard deviation with individual values presented as a dot plot. Statistical significance of beating score was determined with Mann-Whitney test. Statistical significance of the other parameters was determined with Student's *t* test (\* $P < 0.05$ ; \*\* $P < 0.01$ ; \*\*\* $P < 0.001$ ; NS, not significant).

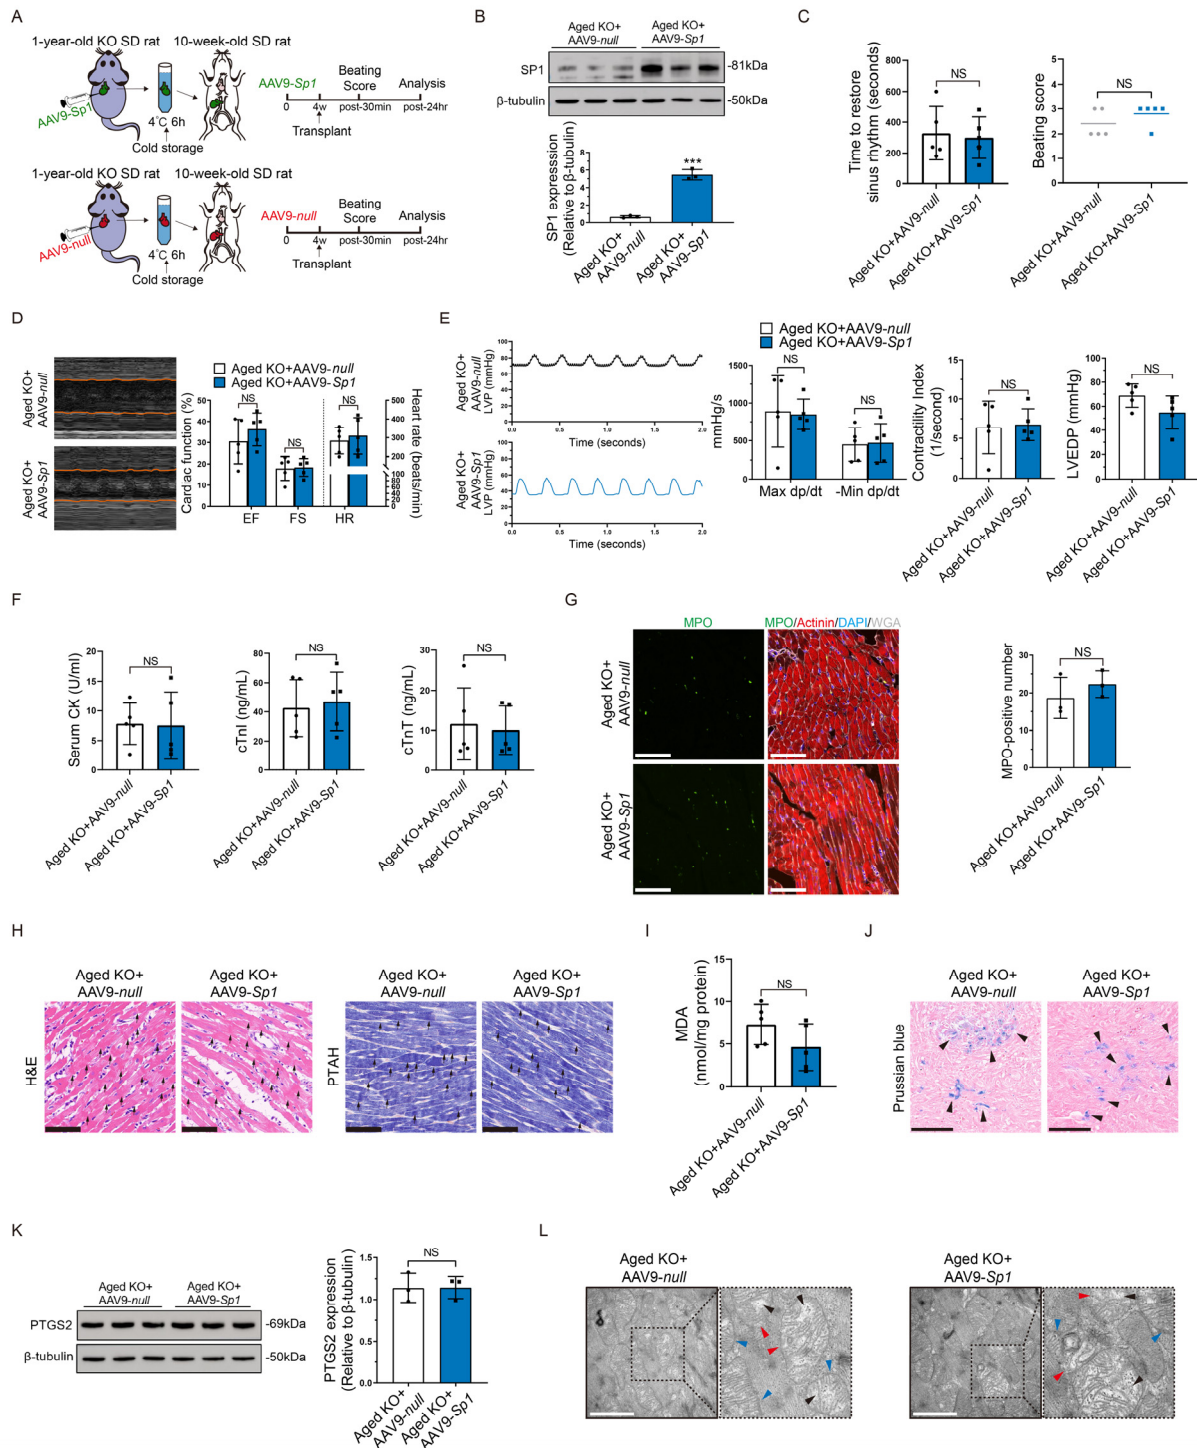

**Supplemental Figure 13. Overexpression of *Sp1* failed to improve hypothermic cardioprotection in *Cirbp*-knockout aged donor hearts during cold storage in transplantation. (A) Experimental design. *Cirbp*-knockout aged rats (1-year-old) were injected with AAV9 vectors carrying *Sp1* cDNA (AAV9-*Sp1*) or control vehicles (AAV9-null) ( $n=5$  in each group). After 4 weeks, the donor hearts were harvested from two groups and transplanted to the wild-type young rats (10-week-old). Hypothermia was used to protect the donor heart during cold storage. The beating score was evaluated at 30 mins after transplantation. The donor heart functions and myocardial injury indicators were measured at 1 day after transplantation. SD, Sprague-Dawley. (B) Western blotting and quantification of SP1 in donor hearts. (C) Assessment of cardiac**

resuscitation after transplantation. **(D)** Cardiac function of donor hearts measured by echocardiography after transplantation. **(E)** Representative left ventricular pressure (LVP) traces and cardiac function parameters of donor hearts determined via cardiac catheterization after transplantation. LVEDP, left ventricular end-diastolic pressure. **(F)** Serum cardiac enzymes in recipients after transplantation. **(G)** MPO staining of donor hearts after transplantation. Scale bars, 50  $\mu\text{m}$ . **(H)** H&E and PTAH staining of donor hearts after transplantation. The arrows indicate myocardial contraction band necrosis. Scale bars, 100 $\mu\text{m}$  in H&E and 50 $\mu\text{m}$  in PTAH. **(I)** Lipid peroxidation in donor hearts after transplantation. **(J)** Prussian blue staining of donor hearts after transplantation. The arrows indicate iron deposition in myocardium. Scale bars, 50  $\mu\text{m}$ . **(K)** Western blotting and quantification of PTGS2 in donor hearts after transplantation. **(L)** Transmission electron microscopy images of donor hearts after transplantation. Blue arrows indicate mitochondrial shrinkage; Black arrows indicate the mitochondrial crista loss; Red arrows indicate mitochondrial membrane rupture. Scale bars, 1  $\mu\text{m}$ . The data shown are the mean  $\pm$  standard deviation with individual values presented as a dot plot. Statistical significance of beating score was determined with Mann-Whitney test. Statistical significance of the other parameters was determined with Student's *t* test (NS, not significant).

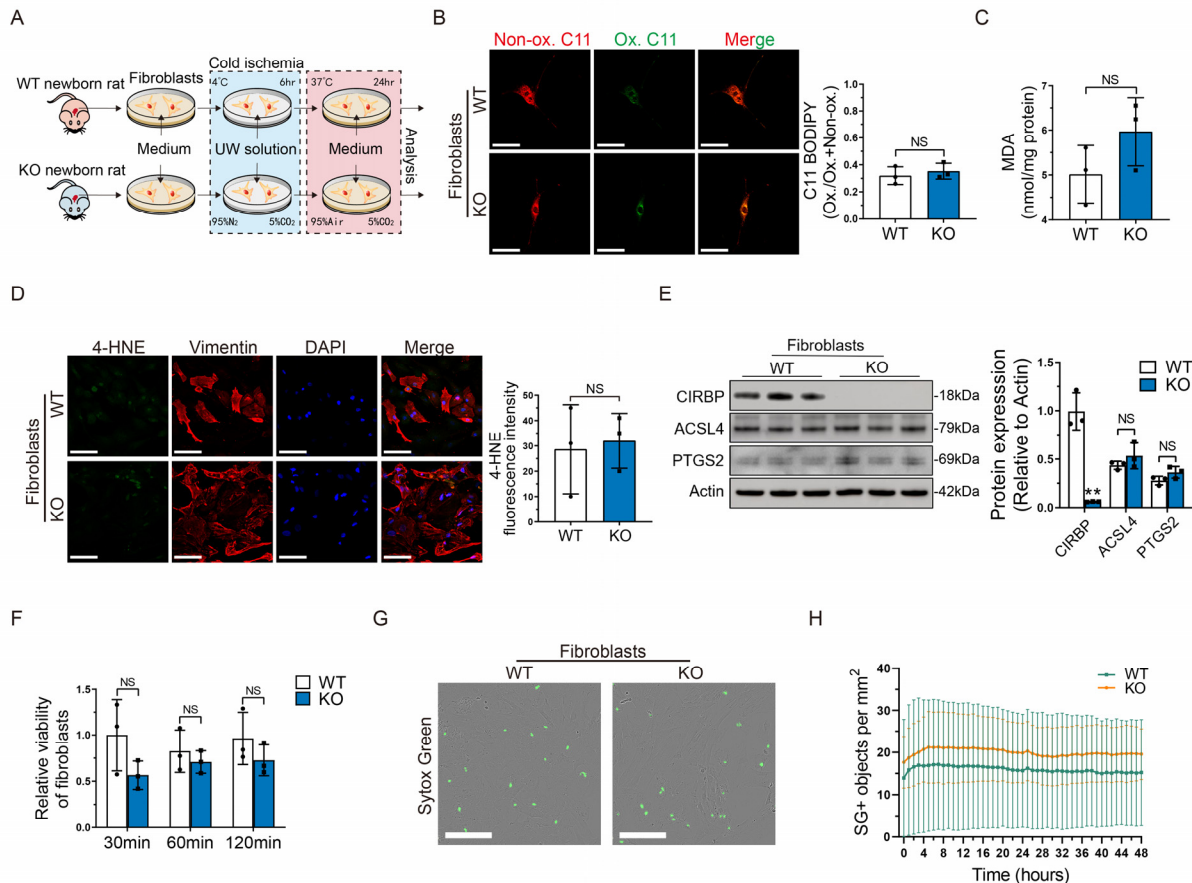

**Supplemental Figure 14. The effect of CIRBP on ferroptosis susceptibility after cold ischemia is not significant in cardiac fibroblasts. (A)** Experimental design. The cardiac fibroblasts were isolated from the wild-type or *Cirbp*-knockout neonatal rats and subjected to cold ischemia. Both groups were treated with UW solution during cold ischemia. **(B)** Fibroblasts labelled with BODIPY 581/591 C11 after cold ischemia. The graph shows the ratio of oxidized-to-total BODIPY 581/591 C11. Ox., oxidized; Non-ox., nonoxidized. Scale bar, 25 $\mu$ m. **(C)** The levels of MDA in fibroblasts after cold ischemia. **(D)** 4-HNE staining of fibroblasts after cold ischemia. Scale bar, 25 $\mu$ m. **(E)** Western blotting and quantification of CIRBP, ACSL4, and PTGS2 in fibroblasts after cold ischemia. **(F)** Cell viability of fibroblasts after cold ischemia. **(G)** Live-cell imaging of fibroblasts incubated with SYTOX Green after cold ischemia. Scale bar, 300  $\mu$ m. **(H)** Time-lapse analysis of cell death in fibroblasts after cold ischemia. SG, SYTOX Green. The data shown are the mean  $\pm$  standard deviation with individual values presented as a dot plot. Statistical significance was determined with Student's t test (NS, not significant).

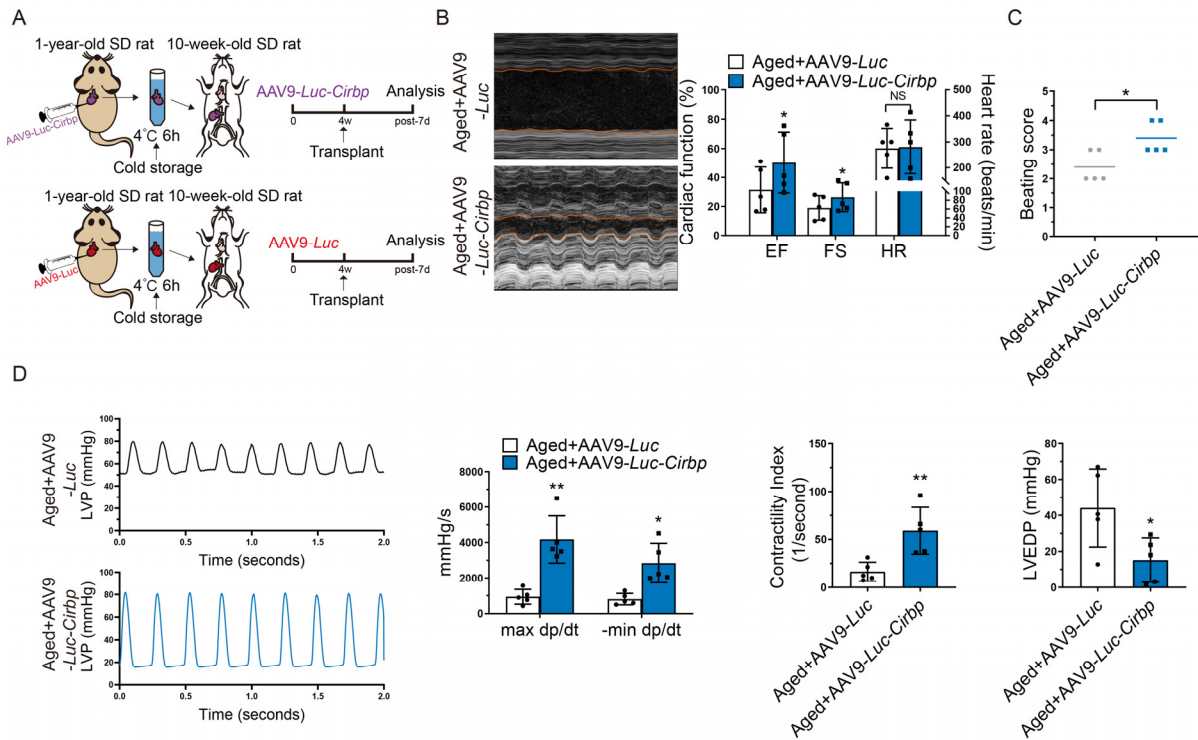

**Supplemental Figure 15. *Cirbp*-overexpressing aged donor hearts showed improved cardiac functions at 7 days after transplantation.** (A) Experimental design. Aged rats (1-year-old) were injected with AAV9 vectors carrying *Cirbp* cDNA (AAV9-*Luc-Cirbp*) or control vehicles (AAV9-*Luc*) (n=5 in each group). After 4 weeks, the donor hearts were harvested from two groups and transplanted to the young rats (10-week-old). Hypothermia was used to protect the donor heart during cold storage. The beating score and donor heart function were measured at 7 days after transplantation. SD, Sprague-Dawley. (B) Cardiac function of donor hearts measured by echocardiography at 7 days after transplantation. EF, ejection fraction; FS, fractional shortening; SV, stroke volume; CO, cardiac output; HR, heart rate. (C) Beating score of donor hearts at 7 days after transplantation. (D) Representative left ventricular pressure (LVP) traces and cardiac function parameters of donor hearts determined via cardiac catheterization at 7 days after transplantation. LVEDP, left ventricular end-diastolic pressure. Quantitative data are shown as the mean  $\pm$  standard deviation with individual values presented as a dot plot. Statistical significance of beating score was determined with Mann-Whitney test. Statistical significance of the other parameters was determined with Student's *t* test (\* $P < 0.05$ ; \*\* $P < 0.01$ ; NS, not significant).

A

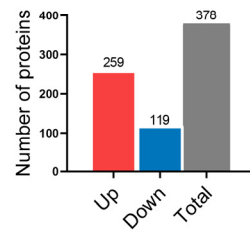

B

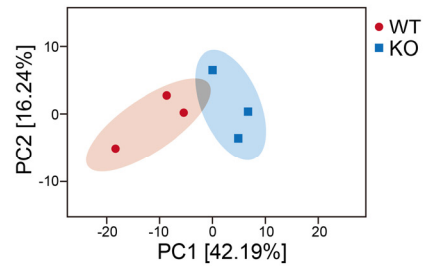

**Supplemental Figure 16. Proteomic analysis of wild-type and *Cirbp*-knockout donor hearts after transplantation. (A)** The total numbers of proteins whose expression were significantly increased or decreased between two groups; **(B)** PCA plots showed the separation of clusters between the two groups (n=3 in each group).

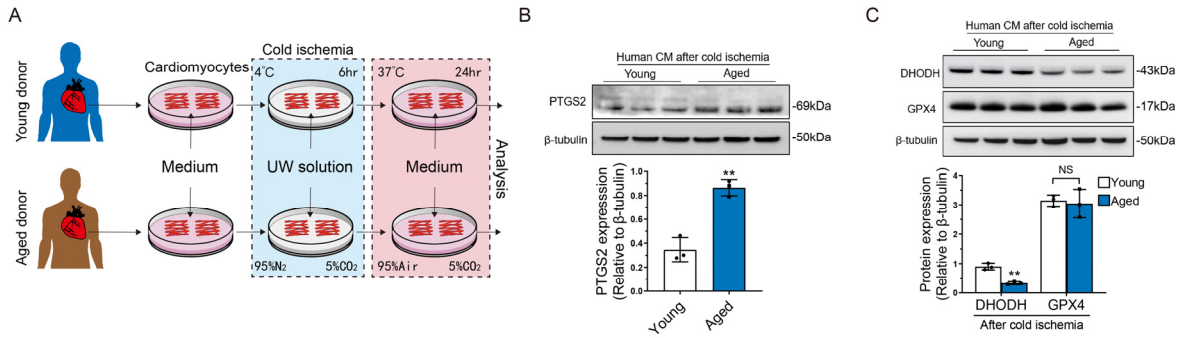

**Supplemental Figure 17. Ferroptosis is exacerbated in aged human cardiomyocytes after cold ischemia.**

(A) Experimental design. The cardiomyocytes were isolated from the young or aged human donor heart and subjected to cold ischemia. Both groups were treated with UW solution during cold ischemia. (B) Western blotting and quantification of PTGS2 in human cardiomyocytes after cold ischemia. (C) Western blotting and quantification of DHODH and GPX4 in human cardiomyocytes after cold ischemia. The data shown are the mean ± standard deviation with individual values presented as a dot plot. Statistical significance was determined with Student's t test (\*\* $P < 0.01$ ; NS, not significant).

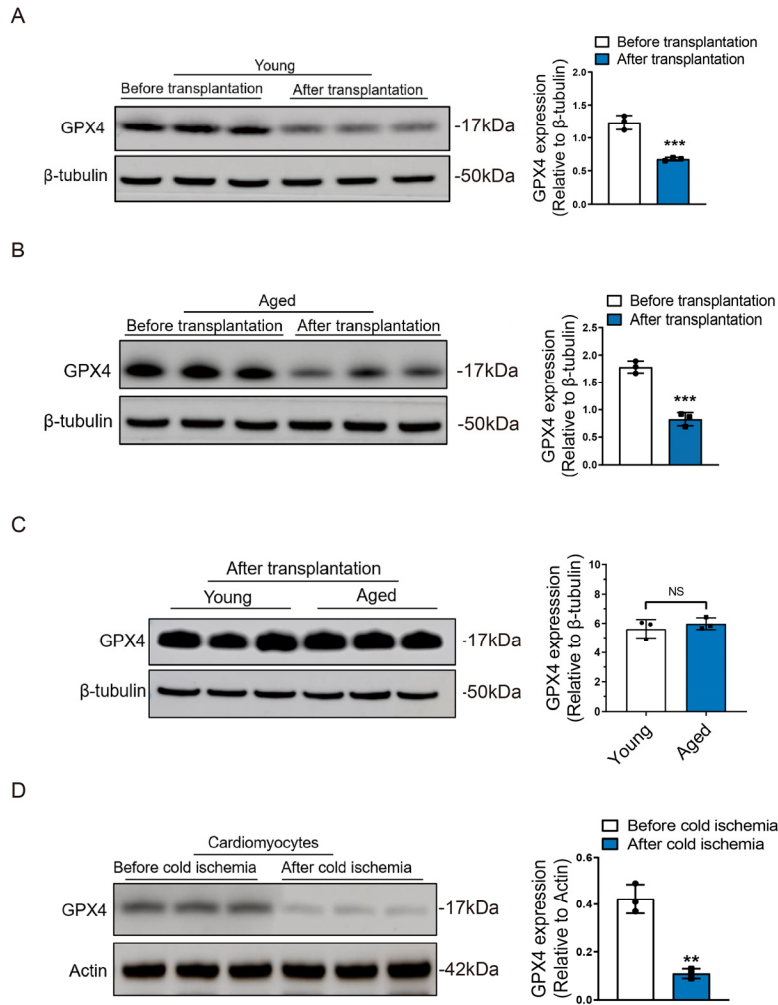

**Supplemental Figure 18. GPX4-mediated ferroptosis defense is compromised during heart transplantation.** (A) Western blotting and quantification of GPX4 in the young donor heart before and after transplantation. (B) Western blotting and quantification of GPX4 in the aged donor heart before and after transplantation. (C) Western blotting and quantification of GPX4 in the young and aged donor heart after transplantation. (D) Western blotting and quantification of GPX4 in the cardiomyocytes before and after cold ischemia. The data shown are the mean  $\pm$  standard deviation. Statistical significance was analyzed by Student's *t* test (\*\* $P < 0.01$ ; \*\*\* $P < 0.001$ ; NS, not significant).



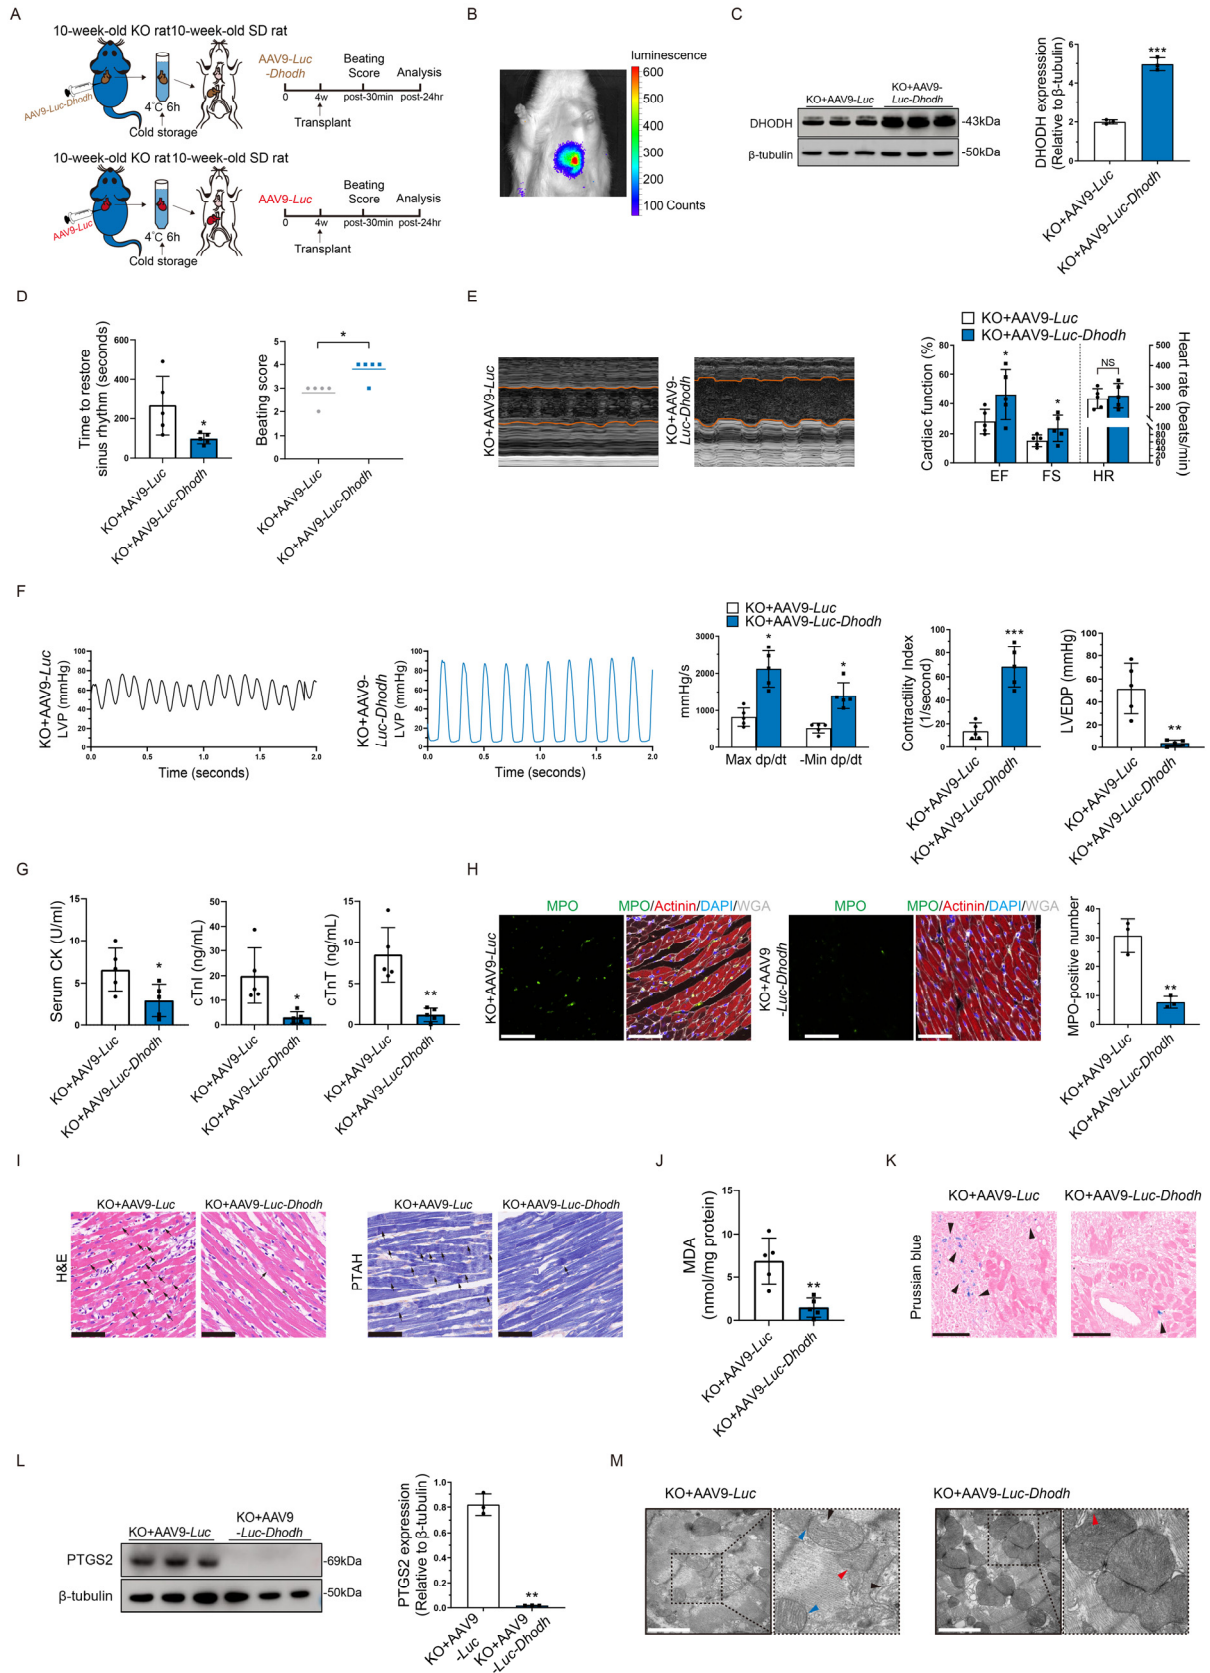

**Supplemental Figure 19. Overexpression of *Dhodh* improves hypothermic cardioprotection in *Cirbp*-knockout young donor hearts during cold storage in transplantation. (A) Experimental design. An AAV9 vector carrying the *cTNT* promoter to drive the expression of firefly luciferase and *Dhodh* (AAV9-**

*Luc-Dhodh*) was injected into *Cirbp*-knockout young rats (10-week-old), and an AAV9 vector carrying firefly luciferase (AAV9-*Luc*) was used as a control (n=5 in each group). After 4 weeks, the donor hearts were harvested from two groups and transplanted to the wild-type young rats (10-week-old). Hypothermia was used to protect the donor heart during cold storage. The beating score was evaluated at 30 mins after transplantation. The donor heart functions and myocardial injury indicators were measured at 1 day after transplantation. SD, Sprague-Dawley. **(B)** In vivo imaged of luciferase in aged rats after AAV9 transfection. **(C)** Western blotting and quantification of DHODH in donor hearts after transplantation. **(D)** Assessment of cardiac resuscitation after transplantation. **(E)** Cardiac function of donor hearts measured by echocardiography after transplantation. **(F)** Representative left ventricular pressure (LVP) traces and cardiac function parameters of donor hearts determined via cardiac catheterization after transplantation. LVEDP, left ventricular end-diastolic pressure. **(G)** Serum cardiac enzymes in recipients after transplantation. **(H)** MPO staining of donor hearts after transplantation. Scale bars, 50  $\mu\text{m}$ . **(I)** H&E and PTAH staining of donor hearts after transplantation. The arrows indicate myocardial contraction band necrosis. Scale bars, 100  $\mu\text{m}$  in H&E and 50  $\mu\text{m}$  in PTAH. **(J)** Lipid peroxidation in donor hearts after transplantation. **(K)** Prussian blue staining of donor hearts after transplantation. The arrows indicate iron deposition in myocardium. Scale bars, 50  $\mu\text{m}$ . **(L)** Western blotting and quantification of PTGS2 in donor hearts after transplantation. **(M)** Transmission electron microscopy images of donor hearts after transplantation. Blue arrows indicate mitochondrial shrinkage; Black arrows indicate the mitochondrial crista loss; Red arrows indicate mitochondrial membrane rupture. Scale bars, 1  $\mu\text{m}$ . The data shown are the mean  $\pm$  standard deviation with individual values presented as a dot plot. Statistical significance of beating score was determined with Mann-Whitney test. Statistical significance of the other parameters was determined with Student's t test (\* $P < 0.05$ ; \*\* $P < 0.01$ , \*\*\* $P < 0.001$ ; NS, not significant).

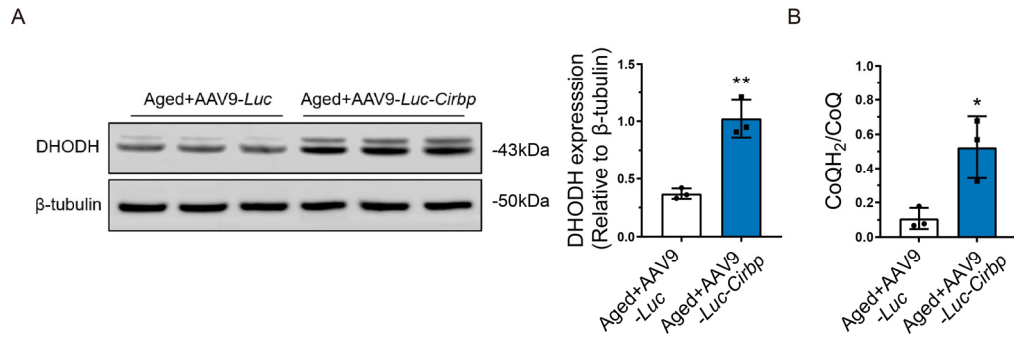

**Supplemental Figure 20. Overexpression of *Cirbp* enhances DHODH expression and CoQ reduction in aged donor heart.** (A) Western blotting and quantification of DHODH in aged donor hearts with or without overexpression of *Cirbp* after transplantation. (B) The CoQH<sub>2</sub>/CoQ ratio in aged donor hearts with or without overexpression of *Cirbp* after transplantation. The data shown are the mean  $\pm$  standard deviation. Statistical significance was analyzed by Student's *t* test (\* $P < 0.05$ ; \*\* $P < 0.01$ ).

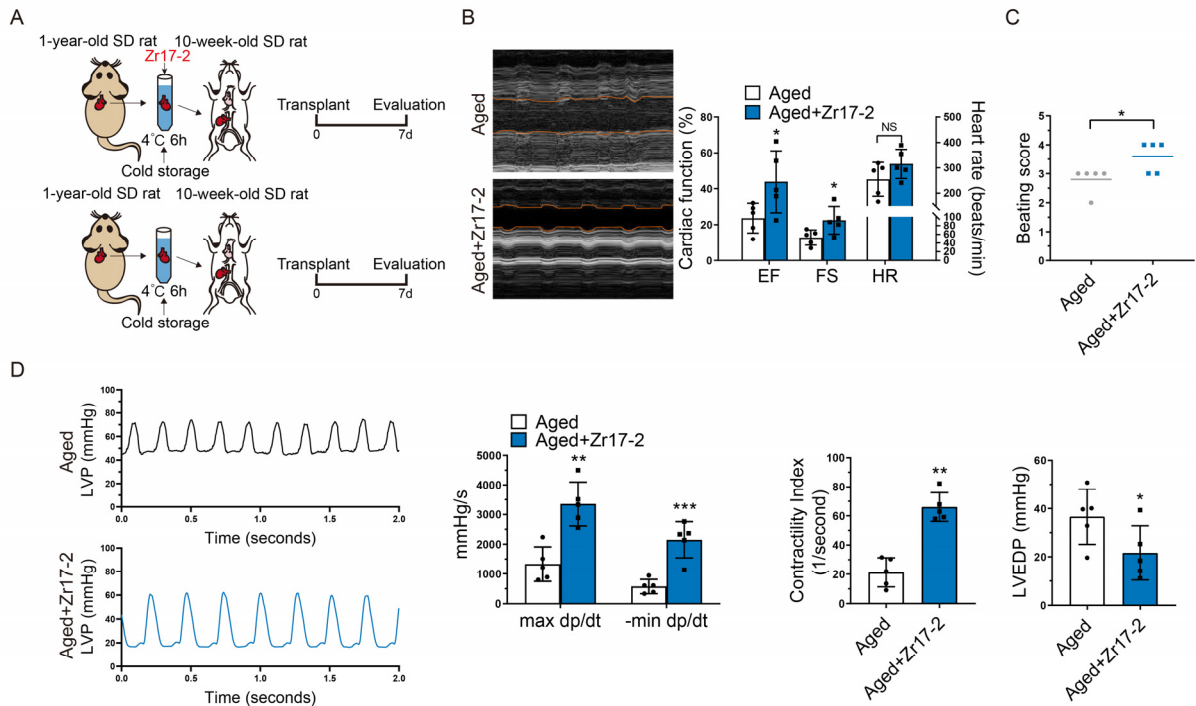

**Supplemental Figure 21. *Cirbp* agonist improved cardiac functions of aged donor hearts at 7 days after transplantation.** (A) Experimental design. Donor hearts were harvested from aged rats (1-year-old). UW solution was used to induce cardiac arrest in control group, and the experimental group used UW solution supplemented with *Cirbp* agonist (Zr17-2) (n=5 in each group). After 6-hours cold ischemia, donor hearts were transplanted to the young rat (10-week-old). Hypothermia was used to protect the donor heart during cold storage. The donor heart functions and myocardial injury indicators were measured at 7 days after transplantation. SD, Sprague-Dawley. (B) Cardiac function of donor hearts measured by echocardiography at 7 days after transplantation. EF, ejection fraction; FS, fractional shortening; SV, stroke volume; CO, cardiac output; HR, heart rate. (C) Beating score of donor hearts at 7 days after transplantation. (D) Representative left ventricular pressure (LVP) traces and cardiac function parameters of donor hearts determined via cardiac catheterization at 7 days after transplantation. LVEDP, left ventricular end-diastolic pressure. Quantitative data are shown as the mean  $\pm$  standard deviation with individual values presented as a dot plot. Statistical significance of beating score was determined with Mann-Whitney test. Statistical significance of the other parameters was determined with Student's t test (\* $P < 0.05$ ; \*\* $P < 0.01$ ; \*\*\* $P < 0.001$ ; NS, not significant).

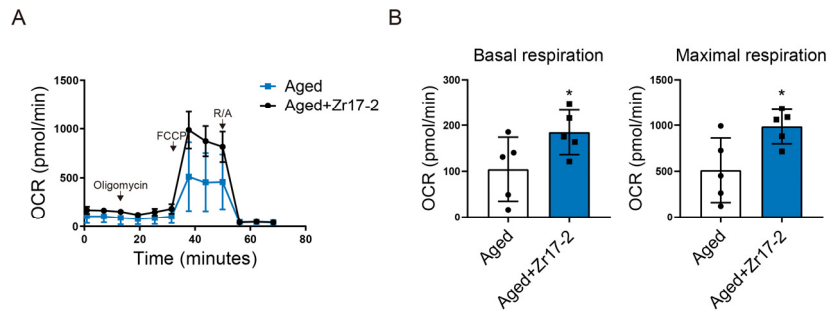

**Supplemental Figure 22. Cardioplegic solution supplemented with *Cirbp* agonist could improve mitochondrial functions of aged donor heart at 1 day after transplantation.** (A) Oxygen consumption rate (OCR) of cardiomyocytes isolated from aged donor heart or Zr17-2 treated aged donor heart at 1 day after transplantation. The traces were recorded by XF24 metabolic analyzer and the mitochondrial effectors were injected at time points indicated by downward arrows. (B) Basal respiration and maximal respiration of cardiomyocytes isolated from two groups. Statistical significance was analyzed by Student's *t* test (\* $P < 0.05$ ).

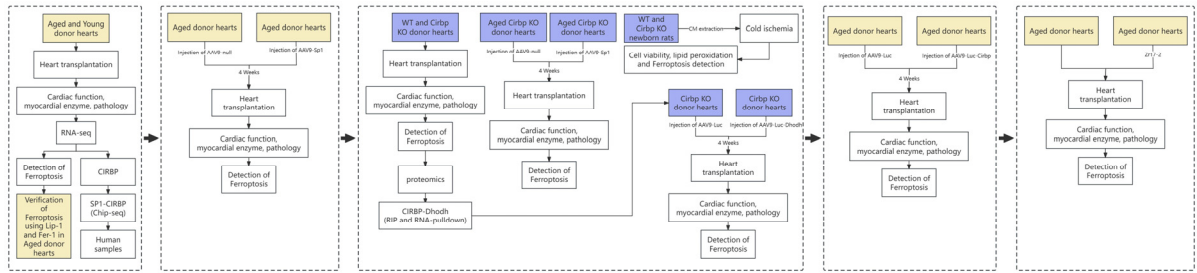

**Supplemental Figure 23. Research process flowchart in our study.** The brown section focused on phenotypes of aged donor heart after transplantation. The blue section focused on exploring its underlying mechanisms.

**Supplemental Tables****Supplemental Table 1. Baseline characteristics of human donors.**

|            | <b>Young donors</b> | <b>Aged donors</b> |
|------------|---------------------|--------------------|
| Number     | 7                   | 5                  |
| Age (year) | 25.0±5.1            | 52.4±6.9           |
| Male (%)   | 71.4                | 80.0               |
| LVEF (%)   | 68.0±6.5            | 68.2±8.9           |
| LVFS (%)   | 35.0±3.9            | 35.1±3.5           |

LVEF, left ventricular ejection fraction; LVFS, left ventricular fractional shortening. Data are mean ± standard deviation.

**Supplemental Table 2. Significantly different proteins (fold change < 0.83 or fold change > 1.2, P < 0.05) in young donor hearts from Cirbp-knockout rats versus wild-type rats.**

| Protein      | Description                                                                 | P value     | Fold Change |
|--------------|-----------------------------------------------------------------------------|-------------|-------------|
| Carhsp1      | Calcium-regulated heat stable protein 1                                     | 0.000357348 | 0.806884621 |
| Rnase2       | Pre-eosinophil-associated ribonuclease-2                                    | 0.000392298 | 1.72354049  |
| Plcd1        | 1-phosphatidylinositol 4,5-bisphosphate phosphodiesterase delta-1           | 0.000631008 | 0.423643054 |
| Cirbp        | Cold-inducible RNA-binding protein                                          | 0.000700132 | 0.519144505 |
| LOC100911104 | Ly6-C antigen                                                               | 0.000714226 | 1.559586585 |
| Hdhd5        | Cat eye syndrome chromosome region, candidate 5 homolog (Human) (Predicted) | 0.001100373 | 0.794621938 |
| Fcgrt        | IgG receptor FcRn large subunit p51                                         | 0.001244084 | 0.722510996 |
| Sqor         | Sqrdl protein                                                               | 0.001280181 | 1.304696804 |
| Reep5        | Receptor expression-enhancing protein 5                                     | 0.001399164 | 0.826194823 |
| Ptms         | Parathymosin                                                                | 0.001402497 | 0.708204388 |
| Rfx1         | Regulatory factor X, 1 (Influences HLA class II expression) (Predicted)     | 0.001583487 | 0.8176      |
| 8-Sep        | Septin-8                                                                    | 0.001624336 | 0.741751844 |
| Ftl1         | Ferritin light chain 1                                                      | 0.001826433 | 1.298472635 |
| Atp2a3       | Calcium-transporting ATPase                                                 | 0.001866854 | 1.51886121  |
| Serpnb6a     | Serine (Or cysteine) peptidase inhibitor, clade B, member 6a                | 0.001895052 | 0.818151958 |
| Gstz1        | Maleylacetoacetate isomerase                                                | 0.002078924 | 1.318547574 |
| Rab3ip       | Rab-3A-interacting protein                                                  | 0.002086068 | 0.717789598 |
| Mboat7l1     | Membrane-bound O-acyltransferase domain-containing 7-like 1                 | 0.002151507 | 1.241301908 |
| Lama4        | Laminin subunit alpha 4                                                     | 0.002197673 | 0.816537933 |
| Coll1a1      | Collagen alpha-1(I) chain                                                   | 0.002216522 | 0.751495176 |
| Cltb         | Clathrin light chain B                                                      | 0.002224421 | 0.821035371 |
| Atxn10       | Ataxin-10                                                                   | 0.002349256 | 0.825367906 |
| Col5a1       | Collagen alpha-1(V) chain                                                   | 0.00250061  | 0.71863343  |
| Fdx1         | Adrenodoxin, mitochondrial                                                  | 0.002519292 | 0.828398668 |
| Myom3        | Myomesin 3                                                                  | 0.002640647 | 0.684265791 |
| Cox19        | Cytochrome c oxidase assembly factor COX19                                  | 0.003051766 | 0.779365476 |
| Chaf1b       | Chromatin assembly factor 1 subunit B                                       | 0.003129556 | 1.244206774 |
| Tlr2         | Toll-like receptor 2                                                        | 0.00316159  | 1.260284126 |
| Mprip        | Myosin phosphatase Rho-interacting protein                                  | 0.003277223 | 0.816554589 |
| Micall2      | MICAL-like protein 2                                                        | 0.0032976   | 1.243982048 |
| Rida         | 2-iminobutanoate/2-iminopropanoate deaminase                                | 0.00332536  | 1.299059929 |
| Fbn1         | Fibrillin 1                                                                 | 0.003676915 | 0.825282    |
| Dhodh        | Dihydroorotate dehydrogenase (quinone), mitochondrial                       | 0.004077    | 0.6660152   |
| Igfbp7       | Insulin-like growth factor binding protein 7, isoform CRA_b                 | 0.004095496 | 0.822652677 |
| Bnip2        | BCL2-interacting protein 2                                                  | 0.004166827 | 1.296583851 |
| Atp1a2       | Sodium/potassium-transporting ATPase subunit alpha-2                        | 0.00438137  | 0.817238357 |
| Nedd8        | NEDD8                                                                       | 0.004561838 | 0.812956126 |
| Ext2         | Exostoses (Multiple) 2 (Predicted)                                          | 0.004661652 | 0.751808336 |
| crp          | Pentaxin                                                                    | 0.004752396 | 1.432377737 |
| Glrx5        | Glutaredoxin 5                                                              | 0.004760031 | 0.811717912 |
| Slpi         | Secretory leukocyte protease inhibitor                                      | 0.004812315 | 3.459562965 |



**Supplemental Table 2. continued**

| <b>Protein</b> | <b>Description</b>                                                       | <b>P value</b> | <b>Fold Change</b> |
|----------------|--------------------------------------------------------------------------|----------------|--------------------|
| Rbfox1         | RNA binding protein fox-1 homolog 1                                      | 0.004848827    | 0.790358433        |
| Fcer1g         | Fc receptor gamma-chain                                                  | 0.004954012    | 1.905592303        |
| Prkaca         | cAMP-dependent protein kinase                                            | 0.005015206    | 0.659816312        |
| Postn          | Periostin                                                                | 0.005034577    | 0.58492317         |
| Dpep1          | Dipeptidase 1                                                            | 0.005094596    | 0.809884718        |
| Hsd11b1        | Corticosteroid 11-beta-dehydrogenase isozyme 1                           | 0.005110183    | 0.67069435         |
| Rac2           | Rac family small GTPase 2                                                | 0.005136074    | 1.376295933        |
| Col3a1         | Collagen alpha-1(III) chain                                              | 0.005486285    | 0.611683598        |
| Ndufv3         | Complex I-9kD                                                            | 0.005549151    | 0.62040515         |
| Pak1ip1        | PAK1-interacting protein 1                                               | 0.005789572    | 1.294985251        |
| Crispld2       | Cysteine-rich secretory protein LCCL domain-containing 2                 | 0.005832119    | 1.349580641        |
| Hk3            | Hexokinase                                                               | 0.00627993     | 1.233980949        |
| RGD1559575     | Similar to novel protein                                                 | 0.006921701    | 1.306364252        |
| Cox17          | Cytochrome C oxidase assembly protein COX17                              | 0.006979744    | 0.667207695        |
| Ifrd1          | Interferon-related developmental regulator 1                             | 0.007338004    | 1.376881397        |
| Caskin2        | Cask-interacting protein 2                                               | 0.007419579    | 0.816009214        |
| Myh15          | Myosin, heavy chain 15                                                   | 0.007849948    | 0.688738979        |
| Tf             | Serotransferrin                                                          | 0.007955       | 1.3183             |
| Rptor          | Regulatory-associated protein of MTOR, complex 1                         | 0.008047063    | 1.252144082        |
| Bola3          | BolA family member 3                                                     | 0.008278832    | 0.828538986        |
| Impa2          | Inositol-1-monophosphatase                                               | 0.008305223    | 0.805244991        |
| Serpib10       | Serine (Or cysteine) peptidase inhibitor, clade B (Ovalbumin), member 10 | 0.008445471    | 1.448928239        |
| Dock8          | Dedicator of cytokinesis 8                                               | 0.008568186    | 1.211004896        |
| Chrac1         | Chromatin accessibility complex 1 (Predicted), isoform CRA_b             | 0.00858366     | 1.204308094        |
| Apoc4          | Apolipoprotein C-IV                                                      | 0.008593371    | 1.746014172        |
| Tpm2           | Tropomyosin beta chain                                                   | 0.008645568    | 0.390846497        |
| Pkia           | cAMP-dependent protein kinase inhibitor alpha                            | 0.008700131    | 0.657725622        |
| Rilp           | Rab interacting lysosomal protein (Predicted)                            | 0.008729554    | 1.219645686        |
| Arhgap45       | Histocompatibility (Minor) HA-1 (Predicted), isoform CRA_b               | 0.00879689     | 1.416170213        |
| Smim20         | Small integral membrane protein 20                                       | 0.008920874    | 0.657824622        |
| Proz           | Proz protein (Fragment)                                                  | 0.008994493    | 1.383093605        |
| Gss            | Glutathione synthetase                                                   | 0.009          | 0.829155591        |
| C1r            | Complement subcomponent C1r                                              | 0.009012408    | 1.297393247        |
| Nqo1           | NAD(P)H dehydrogenase [quinone] 1                                        | 0.009216552    | 1.365541686        |
| Ncf4           | Ncf4 protein                                                             | 0.009306897    | 1.442348704        |
| Hcls1          | Hematopoietic cell-specific LYN substrate 1                              | 0.009430019    | 1.541909392        |
| Parvg          | Parvin, gamma                                                            | 0.009474131    | 1.344815825        |
| Lyz1           | Lysozyme C-1                                                             | 0.00948102     | 1.853005452        |
| Acap2          | Arf-GAP with coiled-coil, ANK repeat and PH domain-containing protein 2  | 0.009588188    | 1.207818431        |
| Stxbp2         | Syntaxin-binding protein 2                                               | 0.009708779    | 1.433068685        |
| Saa4           | Hermansky-Pudlak syndrome 5 protein homolog                              | 0.009919368    | 1.658018156        |
| Apom           | Apolipoprotein M                                                         | 0.010105965    | 1.293233083        |

**Supplemental Table 2. continued**

| <b>Protein</b> | <b>Description</b>                                                                 | <b>P value</b> | <b>Fold Change</b> |
|----------------|------------------------------------------------------------------------------------|----------------|--------------------|
| Cfp            | Complement factor properdin                                                        | 0.010129203    | 1.557110463        |
| Ppic           | Peptidyl-prolyl cis-trans isomerase                                                | 0.010129827    | 0.829491282        |
| Stk4           | Non-specific serine/threonine protein kinase                                       | 0.010134889    | 1.2607152          |
| Hpcal1         | Hippocalcin-like protein 1                                                         | 0.01024535     | 1.217133942        |
| Bop1           | Ribosome biogenesis protein BOP1                                                   | 0.010284617    | 1.264876957        |
| C6             | Complement component C6                                                            | 0.010285843    | 1.529652259        |
| Rab27a         | Ras-related protein Rab-27A                                                        | 0.010505139    | 1.43456944         |
| Cap1           | Adenylyl cyclase-associated protein 1                                              | 0.010610102    | 1.327941103        |
| Uxs1           | UDP-glucuronic acid decarboxylase 1                                                | 0.011084429    | 1.208603418        |
| Diaph1         | Protein diaphanous homolog 1                                                       | 0.011162487    | 1.216110767        |
| Sars2          | Seryl-tRNA synthetase                                                              | 0.011389315    | 0.826539235        |
| Zfp512         | Zinc finger protein 512                                                            | 0.011401846    | 0.768220617        |
| Taco1          | Translational activator of cytochrome c oxidase 1                                  | 0.011418254    | 0.820128539        |
| Gtppb8         | GTP-binding protein 8                                                              | 0.011556099    | 0.672977625        |
| Ethel          | ETHE1, persulfide dioxygenase                                                      | 0.011562953    | 1.235888552        |
| Serpina10      | Protein Z-dependent protease inhibitor                                             | 0.011568331    | 1.522795997        |
| Eln            | Elastin                                                                            | 0.011624167    | 0.796766241        |
| Fgr            | Tyrosine-protein kinase Fgr                                                        | 0.011680857    | 1.467010632        |
| Ptpn1          | Tyrosine-protein phosphatase non-receptor type 1                                   | 0.011885521    | 1.227218029        |
| Arg1           | Arginase-1                                                                         | 0.012220604    | 1.532024793        |
| Nutf2          | Nuclear transport factor 2                                                         | 0.012333948    | 0.828567294        |
| Skap2          | Src kinase-associated phosphoprotein 2                                             | 0.012629513    | 1.492045859        |
| Vasp           | Vasodilator-stimulated phosphoprotein                                              | 0.012658441    | 1.3211021          |
| Chchd1         | Coiled-coil-helix-coiled-coil-helix domain containing 1 (Predicted), isoform CRA_a | 0.012699806    | 0.712661652        |
| Lypla1         | Acyl-protein thioesterase 1                                                        | 0.012991773    | 0.676635134        |
| Card9          | Caspase recruitment domain-containing protein 9                                    | 0.013087515    | 1.323317218        |
| Cygb           | Cytoglobin, isoform CRA_b                                                          | 0.013225046    | 0.759716175        |
| Timm8b         | Mitochondrial import inner membrane translocase subunit Tim8 B                     | 0.013410298    | 0.815067311        |
| Wdr3           | WD repeat domain 3                                                                 | 0.013481295    | 1.214835549        |
| Slc35f6        | Solute carrier family 35 member F6                                                 | 0.013890428    | 1.374153205        |
| Fkbp3          | Peptidylprolyl isomerase (Fragment)                                                | 0.014029436    | 0.79601358         |
| Junb           | Transcription factor jun-B                                                         | 0.01403794     | 1.739039118        |
| Akap12         | A-kinase anchor protein 12                                                         | 0.014606757    | 1.387475697        |
| Pros1          | Vitamin K-dependent protein S                                                      | 0.014663602    | 1.488754243        |
| Pnkp           | Polynucleotide kinase 3-phosphatase                                                | 0.014695105    | 1.238055843        |
| Pesk5          | Proprotein convertase subtilisin/kexin type 5                                      | 0.014882408    | 1.397538016        |
| Tmem38a        | Transmembrane protein 38a (Predicted), isoform CRA_b                               | 0.014887688    | 0.718571394        |
| Gpx3           | Glutathione peroxidase                                                             | 0.015265743    | 1.564650059        |
| Ncf2           | Neutrophil cytosolic factor 2                                                      | 0.015399965    | 1.517204301        |
| Fam173a        | Adenine nucleotide translocase lysine methyltransferase                            | 0.015565093    | 0.765819362        |
| Arhgdib        | Rho GDP dissociation inhibitor beta                                                | 0.015568416    | 1.598965201        |
| Ptpn6          | Tyrosine-protein phosphatase non-receptor type 6                                   | 0.015569331    | 1.352380462        |

**Supplemental Table 2. continued**

| <b>Protein</b> | <b>Description</b>                                                        | <b>P value</b> | <b>Fold Change</b> |
|----------------|---------------------------------------------------------------------------|----------------|--------------------|
| Itgal          | Integrin subunit alpha L                                                  | 0.015579264    | 1.355223881        |
| Gmfg           | Glia maturation factor                                                    | 0.015645707    | 1.593476556        |
| Cybb           | Cytochrome b-245 beta chain                                               | 0.015661204    | 1.732658202        |
| Apbb1ip        | Amyloid beta (A4) protein-binding, family B, member 1 interacting protein | 0.0157474      | 1.409265176        |
| Vrk1           | VRK serine/threonine kinase 1                                             | 0.015747605    | 1.41791905         |
| Cdh1           | Cadherin-1                                                                | 0.015929981    | 1.353670635        |
| Pde2a          | Phosphodiesterase                                                         | 0.015959884    | 0.77900251         |
| Glrx           | Glutaredoxin-1                                                            | 0.015995288    | 1.233626517        |
| Prxl2a         | Peroxiredoxin-like 2A                                                     | 0.016135726    | 1.351494314        |
| Ptp4a3         | Protein tyrosine phosphatase 4A3                                          | 0.016156447    | 0.740780331        |
| Plin4          | Perilipin 4                                                               | 0.016246167    | 0.789079256        |
| Cd74           | H-2 class II histocompatibility antigen gamma chain                       | 0.016292471    | 1.25904928         |
| Blvra          | Biliverdin reductase A                                                    | 0.016461966    | 0.544996457        |
| Mgp            | Matrix Gla protein                                                        | 0.016515283    | 1.387571366        |
| Cavin4         | Caveolae-associated protein 4                                             | 0.01658518     | 0.813106703        |
| Erc1           | ERCC excision repair 1, endonuclease non-catalytic subunit                | 0.016625624    | 0.824362606        |
| Plg            | Plasminogen                                                               | 0.016667869    | 1.624145911        |
| G6pdx          | Glucose-6-phosphate 1-dehydrogenase                                       | 0.016702488    | 1.474996357        |
| Il1rn          | Interleukin-1 receptor antagonist protein                                 | 0.016707704    | 1.397872451        |
| Zyx            | Zyxin                                                                     | 0.016735179    | 1.364610882        |
| Fcn2           | Ficolin-2                                                                 | 0.016950252    | 1.444581573        |
| Pstpip2        | Proline-serine-threonine phosphatase-interacting protein 2                | 0.017108117    | 1.284993205        |
| Habp2          | Hyaluronan-binding protein 2                                              | 0.017195431    | 1.506952224        |
| Lta4h          | Leukotriene A-4 hydrolase                                                 | 0.017211624    | 1.326896235        |
| Myo1g          | Myosin IG                                                                 | 0.017305059    | 1.725971925        |
| Pgd            | 6-phosphogluconate dehydrogenase, decarboxylating                         | 0.017538155    | 1.312363663        |
| Ece1           | Endothelin-converting enzyme 1                                            | 0.017766728    | 1.217772215        |
| Tns2           | Tensin 2                                                                  | 0.017818351    | 0.707390917        |
| Nova2          | NOVA alternative-splicing regulator 2                                     | 0.018113742    | 0.820935243        |
| Akr1b8         | Aldose reductase-like protein                                             | 0.01815684     | 1.531345337        |
| Smim12         | Small integral membrane protein 12                                        | 0.018190957    | 0.797457418        |
| Naca           | Nascent polypeptide-associated complex subunit alpha                      | 0.018202794    | 0.818163873        |
| Rpp30          | Ribonuclease P/MRP subunit p30                                            | 0.018541311    | 1.584429825        |
| F13b           | Coagulation factor XIII B chain                                           | 0.018559641    | 1.245120539        |
| Hspb3          | Heat shock 27kDa protein 3                                                | 0.018562075    | 0.748011433        |
| Tes            | Testin                                                                    | 0.018765179    | 1.237816151        |
| Lcat           | Phosphatidylcholine-sterol acyltransferase                                | 0.018771058    | 1.421361232        |
| Iqgap2         | IQ motif-containing GTPase-activating protein 2                           | 0.018960414    | 1.213555045        |
| C4bpa          | C4b-binding protein alpha chain                                           | 0.019202361    | 1.679114638        |
| Ube2b          | Ubiquitin-conjugating enzyme E2 B                                         | 0.019277318    | 0.6                |
| Arpc1b         | Actin-related protein 2/3 complex subunit 1B                              | 0.019409062    | 1.338325098        |
| C4a            | C4a anaphylatoxin                                                         | 0.019605429    | 1.368485457        |

**Supplemental Table 2. continued**

| <b>Protein</b> | <b>Description</b>                                                            | <b>P value</b> | <b>Fold Change</b> |
|----------------|-------------------------------------------------------------------------------|----------------|--------------------|
| Mrpl35         | 39S ribosomal protein L35, mitochondrial                                      | 0.019816419    | 1.255266758        |
| Arhgap9        | Rho GTPase-activating protein 9                                               | 0.019929713    | 1.322326179        |
| RGD1307182     | Similar to RIKEN cDNA B430306N03 gene                                         | 0.01994467     | 1.537773804        |
| C5ar1          | C5a anaphylatoxin chemotactic receptor 1                                      | 0.020017261    | 1.411037736        |
| Vapb           | Vesicle-associated membrane protein-associated protein B                      | 0.020490697    | 0.814180154        |
| Lsp1           | Lymphocyte specific 1, isoform CRA_a                                          | 0.021247277    | 1.528324996        |
| Apcs           | Pentaxin                                                                      | 0.021288948    | 1.284102704        |
| Pstpip1        | Proline-serine-threonine phosphatase-interacting protein 1                    | 0.021512694    | 1.373447731        |
| Vtn            | Vitronectin                                                                   | 0.02156905     | 1.795375023        |
| Angel2         | Angel homolog 2                                                               | 0.021624217    | 1.205436391        |
| NFIB           | CCAAT-box-binding transcription factor (Fragment)                             | 0.02179729     | 0.76209036         |
| Samhd1         | Deoxynucleoside triphosphate triphosphohydrolase SAMHD1                       | 0.021999921    | 1.283372365        |
| Vdac2          | Voltage-dependent anion-selective channel protein 2                           | 0.022          | 0.825719           |
| Rps24          | 40S ribosomal protein S24                                                     | 0.022133686    | 1.248169542        |
| Cbr4           | Carbonyl reductase family member 4                                            | 0.022180628    | 0.800367157        |
| My17           | Myosin light chain 7                                                          | 0.022364263    | 1.817007168        |
| Fmn11          | Formin-like 1                                                                 | 0.02241324     | 1.21603432         |
| Cd34           | CD34 antigen (Predicted)                                                      | 0.022413491    | 0.798230614        |
| Suox           | Sulfite oxidase, mitochondrial                                                | 0.02262426     | 0.784026389        |
| Arpc5          | Actin-related protein 2/3 complex subunit 5                                   | 0.022695975    | 1.250077515        |
| Rbmx           | RNA-binding motif protein, X chromosome                                       | 0.022714       | 0.809935502        |
| Lep1           | Lymphocyte cytosolic protein 1                                                | 0.023192758    | 1.443853372        |
| Cblb           | E3 ubiquitin-protein ligase CBL-B                                             | 0.023223187    | 1.473177442        |
| Pcdh7          | Protocadherin 7, isoform CRA_b                                                | 0.023277966    | 0.810787172        |
| Ptprc          | Receptor-type tyrosine-protein phosphatase C                                  | 0.023350933    | 1.386906353        |
| Masp1          | Mannan-binding lectin serine protease 1                                       | 0.023541302    | 1.236930377        |
| F9             | Coagulation factor IX                                                         | 0.023590743    | 1.47260298         |
| Ccdc9b         | Coiled-coil domain containing 9B                                              | 0.023604963    | 0.789112327        |
| Tnfaip8        | TNF alpha-induced protein 8                                                   | 0.023665065    | 1.292616372        |
| Cfh            | Complement factor H                                                           | 0.02377252     | 1.425012388        |
| Itgam          | Integrin alpha M                                                              | 0.024052332    | 1.486191469        |
| Nudt3          | Diphosphoinositol polyphosphate phosphohydrolase 1                            | 0.02410264     | 0.809430716        |
| Cpne2          | Copine 2                                                                      | 0.024165858    | 1.299146413        |
| Psmb10         | Proteasome subunit beta type-10                                               | 0.024250048    | 1.20484372         |
| Lamtor2        | Late endosomal/lysosomal adaptor, MAPK and MTOR activator 2                   | 0.0242511      | 1.223439074        |
| Igf1           | Insulin-like growth factor I                                                  | 0.024291765    | 1.246931672        |
| Rbpj2          | Recombination signal-binding protein for immunoglobulin kappa J region-like 2 | 0.024317214    | 1.549992414        |
| Apobr          | Apolipoprotein B receptor                                                     | 0.024981294    | 1.278631588        |
| Pum3           | Pumilio homolog 3                                                             | 0.02519445     | 1.201945227        |
| Rpl35a         | 60S ribosomal protein L35a                                                    | 0.025316104    | 1.263792917        |
| Ass1           | Argininosuccinate synthase                                                    | 0.025625552    | 1.55330438         |
| C8a            | Complement C8 alpha chain                                                     | 0.0256564      | 1.493093398        |

**Supplemental Table 2. continued**

| <b>Protein</b> | <b>Description</b>                                       | <b>P value</b> | <b>Fold Change</b> |
|----------------|----------------------------------------------------------|----------------|--------------------|
| Kcnab2         | Voltage-gated potassium channel subunit beta-2           | 0.025875126    | 1.584830508        |
| Ripk3          | Receptor-interacting serine/threonine-protein kinase 3   | 0.026273986    | 1.487857485        |
| Gsn            | Gelsolin                                                 | 0.026723225    | 1.429971547        |
| F10            | Coagulation factor X                                     | 0.026845711    | 1.635171981        |
| Mustn1         | Musculoskeletal embryonic nuclear protein 1              | 0.027074064    | 0.684726897        |
| C4bpb          | C4b-binding protein beta chain                           | 0.027158632    | 1.567896895        |
| Apob           | Apolipoprotein B-100                                     | 0.027238252    | 1.438034429        |
| Cyba           | Cytochrome b-245 light chain                             | 0.02736959     | 1.741042345        |
| Prg4           | Proteoglycan 4                                           | 0.027388276    | 1.453028072        |
| Serpine1       | Plasminogen activator inhibitor 1                        | 0.027413633    | 1.699577758        |
| Crip2          | Cysteine-rich protein 2                                  | 0.027513768    | 0.799060148        |
| Ctsg           | Cathepsin G                                              | 0.027535544    | 1.882376179        |
| Rad50          | DNA repair protein RAD50                                 | 0.02756596     | 1.238022034        |
| ND4L           | NADH-ubiquinone oxidoreductase chain 4L                  | 0.027569835    | 0.792151028        |
| Gpd1           | Glycerol-3-phosphate dehydrogenase [NAD(+)], cytoplasmic | 0.027587912    | 0.720166945        |
| Itih4          | Inter alpha-trypsin inhibitor, heavy chain 4             | 0.027687666    | 1.499260274        |
| Napsa          | Napsin                                                   | 0.027741414    | 1.547880737        |
| Pccb           | Propionyl coenzyme A carboxylase, beta polypeptide       | 0.028122925    | 1.292553191        |
| Ambp           | Protein AMBP                                             | 0.028293352    | 1.434573605        |
| Atf1           | Atf1 protein (Fragment)                                  | 0.02834681     | 1.23229109         |
| LOC100361907   | Cfh protein                                              | 0.028400268    | 1.670943228        |
| Pram1          | PML-RARA-regulated adaptor molecule 1                    | 0.028533815    | 1.713229511        |
| Lst1           | Leukocyte-specific transcript 1                          | 0.028636383    | 2.106400665        |
| C8b            | Complement component C8 beta chain                       | 0.028886103    | 1.391890612        |
| Sri            | LOC683667 protein                                        | 0.028942551    | 1.292182959        |
| Hmox1          | Heme oxygenase 1                                         | 0.029          | 1.466435           |
| Gca            | Grancalcin                                               | 0.029194962    | 1.455676727        |
| Uck2           | Uridine-cytidine kinase                                  | 0.029457904    | 1.281648089        |
| Tnni1          | Troponin I, slow skeletal muscle                         | 0.02949512     | 0.738345207        |
| Cav1           | Caveolin-1                                               | 0.029497991    | 0.789068079        |
| RGD1564614     | Similar to complement factor H-related protein           | 0.029762026    | 1.394444444        |
| Serpina1a      | Leukocyte elastase inhibitor A                           | 0.029778008    | 1.567314814        |
| Bola1          | BolA family member 1                                     | 0.02990774     | 0.820903818        |
| Spp2           | Secreted phosphoprotein 24                               | 0.029957759    | 1.79047958         |
| Tarsl2         | Threonyl-tRNA synthetase                                 | 0.030041132    | 0.785810306        |
| Vamp8          | Vesicle-associated membrane protein 8                    | 0.030268875    | 1.380330782        |
| Serpinf1       | Alpha-2 antiplasmin                                      | 0.030331141    | 1.333420557        |
| ND1            | NADH-ubiquinone oxidoreductase chain 1                   | 0.030342689    | 0.778567044        |
| Arpc2          | Actin-related protein 2/3 complex subunit 2              | 0.030703246    | 1.202683359        |
| Gabarap        | Gamma-aminobutyric acid receptor-associated protein      | 0.030796472    | 1.351186374        |
| Afap111        | Actin filament-associated protein 1-like 1               | 0.03100964     | 0.819978046        |
| Rpl15          | 60S ribosomal protein L15                                | 0.03124892     | 1.218122454        |

**Supplemental Table 2. continued**

| <b>Protein</b> | <b>Description</b>                                                                    | <b>P value</b> | <b>Fold Change</b> |
|----------------|---------------------------------------------------------------------------------------|----------------|--------------------|
| Ostm1          | Osteoclastogenesis-associated transmembrane protein 1                                 | 0.031338905    | 1.83081688         |
| Sptan1         | Spectrin alpha chain, non-erythrocytic 1                                              | 0.03143128     | 0.811205057        |
| C3             | C3-beta-c                                                                             | 0.03167154     | 1.449590907        |
| Serp1b10       | Serpin B10                                                                            | 0.03213574     | 1.685349066        |
| Rasgrp2        | RAS guanyl releasing protein 2 (Calcium and DAG-regulated) (Predicted), isoform CRA_b | 0.032179532    | 1.636470243        |
| Uchl5          | Ubiquitin carboxyl-terminal hydrolase                                                 | 0.032438466    | 1.325406581        |
| Mpo            | Myeloperoxidase                                                                       | 0.032538833    | 1.775070426        |
| Plin2          | Perilipin                                                                             | 0.03260009     | 1.527985939        |
| Cdc42          | Cell division control protein 42 homolog                                              | 0.032764684    | 1.283144153        |
| Fkbp1a         | Peptidyl-prolyl cis-trans isomerase FKBP1A                                            | 0.032884752    | 0.778627579        |
| Trappc8        | Similar to TRS85 homolog (Predicted)                                                  | 0.032983969    | 1.27171488         |
| Apobec2        | Apolipoprotein B editing complex 2 (Predicted), isoform CRA_a                         | 0.032997988    | 0.769929311        |
| Serp1f2        | RCG33981, isoform CRA_a                                                               | 0.033059748    | 1.598554337        |
| Ccr1           | C-C motif chemokine receptor 1                                                        | 0.033081991    | 1.466679657        |
| Olfm4          | Olfactomedin 4                                                                        | 0.033640646    | 1.815358822        |
| F12            | Coagulation factor XII                                                                | 0.033673222    | 1.328134421        |
| Al13           | Alpha-1-inhibitor 3                                                                   | 0.033740391    | 1.346638936        |
| Plcb3          | 1-phosphatidylinositol 4,5-bisphosphate phosphodiesterase                             | 0.0338216      | 1.206502107        |
| C4b            | C4a anaphylatoxin                                                                     | 0.033856489    | 1.392423159        |
| Tap2           | Antigen peptide transporter 2                                                         | 0.03406937     | 1.243430514        |
| Apoc1          | Apolipoprotein C-I                                                                    | 0.034227503    | 1.643069165        |
| Fmo3           | Dimethylaniline monooxygenase [N-oxide-forming] 3                                     | 0.034260982    | 0.829956981        |
| Hddc3          | HD domain containing 3 (Predicted), isoform CRA_b                                     | 0.034515779    | 0.811275644        |
| Mrps6          | Mitochondrial ribosomal protein S6                                                    | 0.034889746    | 0.764502762        |
| Ciapi1         | Anamorsin                                                                             | 0.034965449    | 0.825451504        |
| S100a11        | Protein S100-A11                                                                      | 0.035095859    | 1.324260786        |
| Bmp1           | Metalloendopeptidase                                                                  | 0.035233903    | 1.661080074        |
| Alox12         | Alox12 protein                                                                        | 0.0356         | 1.38844            |
| C8g            | Complement C8 gamma chain                                                             | 0.035663398    | 1.432435908        |
| Myh8           | Myosin-8                                                                              | 0.035702608    | 1.232492997        |
| Commd5         | COMM domain-containing protein 5                                                      | 0.035729798    | 1.2784             |
| Slc3a2         | 4F2 cell-surface antigen heavy chain                                                  | 0.036          | 1.201              |
| Pld4           | Phospholipase D family, member 4                                                      | 0.036387518    | 1.231636995        |
| Pygl           | Glycogen phosphorylase, liver form                                                    | 0.036438645    | 1.559273496        |
| Zfp131         | Zinc finger protein 131                                                               | 0.03666192     | 1.312865497        |
| Bst1           | ADP-ribosyl cyclase/cyclic ADP-ribose hydrolase 2                                     | 0.03666497     | 1.229820628        |
| Cnn2           | Calponin (Fragment)                                                                   | 0.036716204    | 1.41192592         |
| Ltv1           | Protein LTV1 homolog                                                                  | 0.036727782    | 1.236872812        |
| Casp1          | Caspase-1                                                                             | 0.0369461      | 1.260079552        |
| Ogn            | Mimecan                                                                               | 0.036953364    | 0.732633524        |
| Ostf1          | Osteoclast-stimulating factor 1                                                       | 0.037070383    | 1.25599448         |

**Supplemental Table 2. continued**

| <b>Protein</b> | <b>Description</b>                                            | <b>P value</b> | <b>Fold Change</b> |
|----------------|---------------------------------------------------------------|----------------|--------------------|
| Sirpa          | Sirpa protein                                                 | 0.037202381    | 1.247602668        |
| Litaf          | LPS-induced TN factor                                         | 0.037277182    | 1.393313555        |
| Hpx            | Hemopexin                                                     | 0.037317087    | 1.402081908        |
| Prkar1a        | cAMP-dependent protein kinase type I-alpha regulatory subunit | 0.037450218    | 0.739594546        |
| Ckb            | Creatine kinase B-type                                        | 0.037603144    | 0.701413671        |
| Slc29a3        | Equilibrative nucleoside transporter 3                        | 0.03761487     | 1.249124854        |
| Eif3f          | Eukaryotic translation initiation factor 3 subunit F          | 0.037647063    | 1.546193399        |
| A1m            | Alpha-1-macroglobulin                                         | 0.037741616    | 1.396635311        |
| Papola         | Poly(A) polymerase                                            | 0.037746372    | 1.221815623        |
| Rcn3           | Reticulocalbin-3                                              | 0.037775907    | 0.811738504        |
| Ano10          | Anoctamin                                                     | 0.037845565    | 1.251106195        |
| Cfhr2          | Complement factor H-related 2                                 | 0.037880889    | 1.747255261        |
| Abcc3          | Canalicular multispecific organic anion transporter 2         | 0.038012646    | 1.289534766        |
| Crym           | Ketimine reductase mu-crystallin                              | 0.038264131    | 0.78772022         |
| Ptpn2          | Tyrosine-protein phosphatase non-receptor type 2              | 0.038790201    | 1.297441365        |
| Mmp8           | Neutrophil collagenase                                        | 0.039063961    | 1.519208605        |
| Rab6a          | RCG39700, isoform CRA_d                                       | 0.039449312    | 1.232817869        |
| C9             | Complement component C9                                       | 0.039450553    | 1.414654576        |
| Hyi            | Putative hydroxypyruvate isomerase                            | 0.039566925    | 0.812384005        |
| Naaa           | N-acyl ethanolamine-hydrolyzing acid amidase                  | 0.039760391    | 1.366931352        |
| Ublcp1         | Ubiquitin-like domain-containing CTD phosphatase 1            | 0.039810959    | 1.229155163        |
| Angptl4        | Angiopoietin-related protein 4                                | 0.039859457    | 1.442830417        |
| Thbs1          | Thrombospondin 1                                              | 0.040001828    | 1.624418455        |
| C1qc           | Complement C1q subcomponent subunit C                         | 0.040029579    | 1.29279002         |
| Hck            | Tyrosine-protein kinase HCK                                   | 0.040130665    | 1.209816904        |
| Ecm1           | Extracellular matrix protein 1                                | 0.040198337    | 1.40836204         |
| MGC105649      | Hypothetical LOC302884                                        | 0.040327119    | 1.596535853        |
| Gstt2          | Glutathione transferase                                       | 0.040344788    | 0.812063853        |
| Apoe           | Apolipoprotein E                                              | 0.040452378    | 1.444034628        |
| Bgn            | Biglycan                                                      | 0.040498795    | 0.779261341        |
| Fermt3         | Fermitin family member 3                                      | 0.04063047     | 1.453953443        |
| Kidins220      | Kinase D-interacting substrate of 220 kDa                     | 0.040667755    | 1.345098039        |
| Nat1           | Arylamine N-acetyltransferase                                 | 0.041242089    | 0.74852071         |
| Pkm            | Pyruvate kinase                                               | 0.041393295    | 1.202248235        |
| Apoc2          | Apolipoprotein C-II                                           | 0.04159402     | 1.400470172        |
| Trip13         | Pachytene checkpoint protein 2 homolog                        | 0.041782297    | 1.273031826        |
| Far1           | Fatty acyl-CoA reductase                                      | 0.042165112    | 1.205340949        |
| Cpne1          | Copine-1                                                      | 0.042273385    | 1.363584658        |
| Arpc4          | Actin-related protein 2/3 complex subunit 4                   | 0.042698393    | 1.236062746        |
| Itih3          | Inter-alpha-trypsin inhibitor heavy chain H3                  | 0.042727181    | 1.370742233        |
| Stk19          | Serine/threonine kinase 19 (Fragment)                         | 0.042739113    | 1.28515625         |
| Soat1          | O-acyltransferase                                             | 0.042787949    | 1.451935081        |

**Supplemental Table 2. continued**

| <b>Protein</b> | <b>Description</b>                                                                            | <b>P value</b> | <b>Fold Change</b> |
|----------------|-----------------------------------------------------------------------------------------------|----------------|--------------------|
| Blvra          | Biliverdin reductase A                                                                        | 0.043000957    | 1.417810672        |
| Fgl1           | Fibrinogen-like protein 1                                                                     | 0.043039341    | 2.159038931        |
| Serping1       | Plasma protease C1 inhibitor                                                                  | 0.043247763    | 1.300132278        |
| Camp           | Cathelicidin antimicrobial peptide                                                            | 0.043411165    | 1.809623431        |
| H4c2           | Histone H4                                                                                    | 0.043479288    | 1.211853007        |
| Afm            | Afamin                                                                                        | 0.043915503    | 1.317000464        |
| Alox15         | Polyunsaturated fatty acid lipoyxygenase ALOX15                                               | 0.0444         | 1.39692            |
| Apoc3          | Apolipoprotein C-III                                                                          | 0.04444722     | 1.283686771        |
| Rps6ka6        | Non-specific serine/threonine protein kinase                                                  | 0.044477303    | 1.343501326        |
| Alox5          | Polyunsaturated fatty acid 5-lipoyxygenase                                                    | 0.044529171    | 1.384967262        |
| Cp             | Ceruloplasmin                                                                                 | 0.044646895    | 1.346199549        |
| Stxbp5         | Syntaxin-binding protein 5                                                                    | 0.044718801    | 1.394270339        |
| Arhgap25       | Rho GTPase-activating protein 25                                                              | 0.045004931    | 1.30567221         |
| Rgs14          | Regulator of G-protein signaling 14                                                           | 0.045444603    | 1.272886638        |
| Pld6           | Phospholipase D family, member 6                                                              | 0.045772388    | 0.814091248        |
| Tnxb           | Tnxb protein (Fragment)                                                                       | 0.045839015    | 0.821323584        |
| Anxa1          | Annexin A1                                                                                    | 0.045897536    | 1.728770284        |
| Fbln1          | Fibulin-1                                                                                     | 0.04594123     | 1.425467614        |
| Igfals         | Insulin-like growth factor-binding protein complex acid labile subunit                        | 0.046031733    | 1.451052699        |
| Ubxn4          | UBX domain-containing protein 4                                                               | 0.046179362    | 0.808398334        |
| Rpl34          | 60S ribosomal protein L34                                                                     | 0.046382918    | 1.274526914        |
| Ncam1          | Neural cell adhesion molecule 1                                                               | 0.046573664    | 0.808440711        |
| Dis3l2         | DIS3-like exonuclease 2                                                                       | 0.046575169    | 1.305642633        |
| Iffo1          | Intermediate filament family orphan 1                                                         | 0.046605815    | 1.814543579        |
| Sh3pxd2b       | SH3 and PX domains 2B                                                                         | 0.047729973    | 1.249520961        |
| Faf1           | FAS-associated factor 1                                                                       | 0.047845868    | 1.357539549        |
| Slc9a3r1       | Na(+)/H(+) exchange regulatory cofactor NHE-RF1                                               | 0.047862002    | 1.273049645        |
| Adssl1         | Adenylosuccinate synthetase isozyme 1                                                         | 0.047863763    | 0.767756864        |
| Gpsm3          | G-protein-signaling modulator 3                                                               | 0.047998578    | 1.489547885        |
| Aco1           | Cytoplasmic aconitate hydratase                                                               | 0.048150024    | 1.513326752        |
| Clu            | Clusterin                                                                                     | 0.048155478    | 1.472195821        |
| Stk3           | Serine/threonine-protein kinase 3                                                             | 0.048187971    | 1.223949212        |
| Trex1          | RCG26064                                                                                      | 0.048323503    | 1.205294705        |
| Cd5l           | CD5 antigen-like                                                                              | 0.048408537    | 1.621287665        |
| Selenop        | Selenoprotein P                                                                               | 0.048713829    | 1.35126957         |
| Btk            | Tyrosine-protein kinase                                                                       | 0.04880241     | 1.21118082         |
| Smc2           | Structural maintenance of chromosomes protein                                                 | 0.048832745    | 1.250401653        |
| Lrrfip1        | Leucine-rich repeat flightless-interacting protein 1                                          | 0.048889546    | 1.214483764        |
| Nckap1l        | NCK associated protein 1 like (Predicted)                                                     | 0.0489884      | 1.265395527        |
| Fscn1          | Fascin                                                                                        | 0.048992407    | 0.73138098         |
| Smarcd2        | SWI/SNF-related matrix-associated actin-dependent regulator of chromatin subfamily D member 2 | 0.049128887    | 1.208092486        |



**Supplemental Table 2. continued**

| <b>Protein</b> | <b>Description</b>                 | <b><i>P</i> value</b> | <b>Fold Change</b> |
|----------------|------------------------------------|-----------------------|--------------------|
| Mug1           | Murinoglobulin-1                   | 0.049171274           | 1.244647404        |
| Lbh            | Protein LBH                        | 0.049222684           | 1.270945723        |
| Lbp            | Lipopolysaccharide-binding protein | 0.049498312           | 1.715342314        |

**Supplemental Table 3. Sequences matched with CIRBP binding motif in the 3' UTR region of *Dhodh* mRNA**

| <b>Strand</b> | <b>p-value</b> | <b>Matched Sequence</b>                              |
|---------------|----------------|------------------------------------------------------|
| +             | 0.00307        | CAAATCCCATTGTCACCTCCCTAGATCTAAATCCTGGGATTGATCAGTATCA |
| +             | 0.005          | CAGAAGGACATTGGCTTCTTGGGAGGAAAAATCGTGGAGAAAATAAAGCCA  |
| +             | 0.00766        | AGTGAAGAACTTCTCTAATCACTTGAGGAGACCACAAATCCCATTGTCACT  |
| +             | 0.008          | CCATTGGAGCAGATCATCGGAGGTGACCATACGTGCCAGAAGTCCCATCCA  |

**Supplemental Table 4. Antibodies used in immunofluorescence staining.**

| <b>Target antigen</b>        | <b>Vendor</b> | <b>Catalog#</b> | <b>Concentration</b> |
|------------------------------|---------------|-----------------|----------------------|
| Rabbit anti-Myeloperoxidase  | Abcam         | ab208670        | 1:200                |
| Rabbit anti-COX2             | Abcam         | ab179800        | 1:200                |
| Rabbit anti-CIRBP antibody   | Proteintech   | 10209-2-AP      | 1:200                |
| Rabbit anti-SP1 antibody     | Proteintech   | 21962-1-AP      | 1:200                |
| Mouse anti-Actinin           | Abcam         | ab9465          | 1:200                |
| Rabbit anti-GSDMD            | Proteintech   | 20770-1-AP      | 1:200                |
| Rabbit anti-4 Hydroxynonenal | Bioss         | bs-6313R        | 1:200                |
| Mouse anti-Vimentin          | Proteintech   | 60330-1-Ig      | 1:200                |

**Supplemental Table 5. Antibodies used in western blot.**

| <b>Target antigen</b>                  | <b>Vendor</b> | <b>Catalog#</b> | <b>Concentration</b> |
|----------------------------------------|---------------|-----------------|----------------------|
| Rabbit anti- $\beta$ -tubulin antibody | Abcam         | ab179513        | 1:1000               |
| Rabbit anti-Actin antibody             | Abcam         | ab185058        | 1:10000              |
| Rabbit anti- $\beta$ -actin antibody   | Abcam         | ab8227          | 1:5000               |
| Rabbit anti-PTGS2 antibody             | CST           | 12282S          | 1:1000               |
| Rabbit anti-ACSL4 antibody             | Abcam         | ab155282        | 1:1000               |
| Rabbit anti-CIRBP antibody (for Rat)   | Proteintech   | 10209-2-AP      | 1:1000               |
| Rabbit anti-CIRBP antibody (for Human) | Abcam         | ab191885        | 1:1000               |
| Rabbit anti-SP1 antibody               | Proteintech   | 21962-1-AP      | 1:1000               |
| Rabbit anti-DHODH antibody             | Proteintech   | 14877-1-AP      | 1:1000               |
| Rabbit anti-Histone H3 antibody        | Abcam         | ab176842        | 1:1000               |
| Rabbit anti-Caspase 1 antibody         | Proteintech   | 22915-1-AP      | 1:1000               |
| Rabbit anti-Caspase 3 antibody         | CST           | 9662S           | 1:1000               |
| Rabbit anti-Cleaved caspase 3 antibody | CST           | 9664T           | 1:1000               |
| Rabbit anti-NOX2 antibody              | Abcam         | ab129068        | 1:1000               |
| Rabbit anti-ALOX5 antibody             | Abcam         | ab169755        | 1:1000               |
| Rabbit anti-ALOX15 antibody            | Abcam         | ab244205        | 1:1000               |
| Rabbit anti-GPX4 antibody              | Abcam         | ab125066        | 1:1000               |
